## Two stochastic processes shape diverse senescence patterns in a single-cell organism

Short title: Stochastic processes shape senescence

Ulrich K. Steiner<sup>\*1,2,3,4</sup>, Adam Lenart<sup>1‡</sup>, Ming Ni<sup>3,4,5‡</sup>, Peipei Chen<sup>3,6</sup>, Xiaohu Song<sup>3</sup>, François Taddei<sup>3,4</sup>, Ariel B. Lindner<sup>3,4†</sup>, & James W. Vaupel<sup>1†</sup>

1

2 <sup>1</sup> Center on Population Dynamics, Campusvej 55, 5230 Odense, Denmark

3 <sup>2</sup>Biology Department, University of Southern Denmark, Campusvej 55, 5230 Odense, Denmark

4 <sup>3</sup>Center for Research and Interdisciplinarity, Paris Descartes University, 75014, Paris, France

5 <sup>4</sup>INSERM U1001, 75014 Paris, France

6 <sup>5</sup> Current address: BGI Shenzhen, Shenzhen, China

7 <sup>6</sup> Current address: National Center for Nanoscience and Technology, Beijing, China

8

9

10 **\*Corresponding author: [usteiner@biology.sdu.dk](mailto:usteiner@biology.sdu.dk)**

11 <sup>†</sup>Joint senior authors

12 <sup>‡</sup>Equal contribution of second authors

13 Keywords: senescence, mechanisms of aging, evolution of aging, asymmetry, damage accumulation,  
14 aging models,

15 Authors contributions: UKS designed the study, UKS, MN & PC performed the experiments, UKS,  
16 AL, XS analyzed the data, all authors substantially contributed to discussions and writing the  
17 manuscript, UKS wrote the first and final draft of the manuscript.

18

## 19 **Abstract**

20 Despite advances in aging research, a multitude of aging models, and empirical evidence for diverse  
21 senescence patterns, understanding is lacking of the biological processes that shape senescence, both for  
22 simple and complex organisms. We show that for a isogenic *Escherichia coli* bacterial population  
23 senescence results from two stochastic processes. A primary random deterioration process within the  
24 cell, such as generated by random accumulation of damage, leads to an exponential increase in mortality  
25 early in life followed by a late age mortality plateau; a secondary process of stochastic asymmetric  
26 transmission of an unknown factor at cell fission influences mortality. This second process is required to  
27 explain the difference between the classical mortality plateaus detected for young mothers' offspring and  
28 the near non-senescence of old mothers' offspring as well as the lack of a mother offspring correlation  
29 in age at death. We observed that life span is predominantly determined by underlying stochastic stage  
30 dynamics. Our findings support models based on stage-specific actions of alleles for the evolution of  
31 senescence. This support might be surprising since these models that have not specifically been  
32 developed in the context of simple, single cell organisms. We call for exploration of similar stochastic  
33 influences beyond simple organisms.

34

## 35 **Introduction**

36 One of the major challenges for biodemographic research on aging is to understand what drives  
37 senescence patterns (Vaupel et al. 1998, López-Otín et al. 2013). This challenge is illustrated by the  
38 variety of aging models that assume different, as yet unverified generating processes (Hamilton 1966,  
39 Kirkwood 2005, Wachter et al. 2014). Prominent — mutually not exclusive — evolutionary theories of  
40 senescence, such as William's antagonistic pleiotropy hypothesis (Williams 1957), or Medawar's  
41 mutation accumulation hypothesis (Medawar 1952), provide general predictions about uniform

42 senescence patterns across many taxa (Hamilton 1966). However, these generalities have been  
43 questioned both theoretically and empirically by illustrating how negligible and negative-senescence can  
44 theoretically be achieved and been empirically found in various species (Vaupel et al. 2004, Jones et al.  
45 2014). Despite an extensive literature on mechanistic approaches of aging, the generating processes that  
46 drive such diversity in senescence patterns remain opaque (López-Otín et al. 2013). Mechanistic  
47 approaches to aging identify a multitude of underlying biochemical, molecular and organismal  
48 mechanisms that relate to the decline of function with age, many of which are rooted in direct or indirect  
49 oxidative processes (Kirkwood 2005, López-Otín et al. 2013). Examples include age-related  
50 mitochondrial dysfunction, telomere shortening, stem cell exhaustion, genotypic instability, epigenetic  
51 alterations, accumulation of damaged proteins and general loss of proteostasis (Lindner and Demarez  
52 2009, Tyedmers et al. 2010, López-Otín et al. 2013). Yet, researchers have not conclusively determined  
53 whether such mechanisms are a cause or consequence of aging. This failure may be due to the complexity  
54 of model systems of aging. As a consequence, it is difficult to relate these mechanisms directly to the  
55 observed demographic patterns (Tyedmers et al. 2010, López-Otín et al. 2013, Denoth Lippuner et al.  
56 2014). Only such linkage — between mechanisms and senescence patterns — can elucidate generating  
57 processes that underlie the various theories and aspects of aging.

58  
59 Aging in bacteria has been established over the last one and a half decades and thereby provided a  
60 simple biological system to study aging (Ackermann et al. 2003, Stewart et al. 2005). Before, bacteria  
61 have been thought to not age (Williams 1957), because they normally fission into two equal sized  
62 progeny. These progeny were assumed to be identical, that is, the original mother cell would die when  
63 fissioning and leaves two identical daughters (Johnson and Mangel 2006, Tyedmers et al. 2010). This  
64 perspective has changed because the resulting progeny are phenotypically unequal (Tyedmers et al.

65 2010). This asymmetry among the progeny is manifested by asymmetry of intracellular content at cell  
66 fission and between carrying old and newly formed cellular poles (Stewart et al. 2005, Lindner et al.  
67 2008). Here, we follow the convention of old pole and new pole cells, being referred to as mother and  
68 daughter cell respectively (Fig. 1), to track the age of individual cells (Stewart et al. 2005). It has been  
69 shown that mother cells have a higher probability to accumulate misfolded protein and grow slower as  
70 compared to their daughter cells, but a causal relationship to mortality was not established (Lindner et  
71 al. 2008). From a theoretical point of view asymmetry is required to rejuvenate some cells in order to  
72 prevent whole population aging. Otherwise populations would accumulate more and more damage if  
73 perfect symmetric fissions occurred and damage accumulation accedes damage repair and dilution due  
74 to growth and fission (Ackermann et al. 2007, Evans and Steinsaltz 2007).

75

76 Here, we reveal characteristics of the underlying aging processes by inference from observed senescence  
77 patterns. We achieve this aim by quantifying demographic parameters of a simple biological system,  
78 isogenic individual *E. coli* bacteria cells, under highly controlled environmental conditions. We used a  
79 high-throughput microfluidic device (Fig. 1; movie S1) to track individual cells throughout their lives  
80 (Wang et al. 2010, Gasset-Rosa et al. 2014, Jouvét et al. 2017). Two types of cells were tracked: early  
81 daughter cells and late daughter cells (Fig.1). A late daughter cell is the last daughter cell produced by  
82 an early daughter and hence an offspring of an old mother. An early daughter cell is the offspring of a  
83 young mother since they were haphazardly extracted from a population that grew exponentially.  
84 According to stable stage population theories such exponentially growing populations are vastly  
85 dominated by young cells (Caswell 2001)(Fig. S1). We expect early daughters to hold little or no  
86 deterioration or damage at birth, whereas late daughters are likely be born with some damage. In this  
87 study, we use damage as a synonym for any unknown aging factor that leads to deterioration and

88 increased mortality. We use this synonym because many aging factors are assumed to be accumulated  
89 damage caused by oxidative processes (Kirkwood et al. 2005, López-Otín et al. 2013). A third group of  
90 cells, resembling the late daughter type are the last daughter cells produced by the late daughters, which  
91 we call second generation late daughters (Results only in SI1). Our definition of mother and daughter  
92 cells builds on the concept of cell polarity for both early daughter and late daughter cells to track the age  
93 of cells and distinguish between the mothers (old pole cell) and the daughters (new pole cell) (Fig.1).

94

## 95 **Material and Methods**

96 For brevity we only provide in this section an overview of the methods. For more detailed methodological  
97 information on strains and growth conditions, time-lapse imaging, image analysis, determining death and  
98 estimating demographic parameters, statistical analyses, the simulations please see the supplemental  
99 information.

100

101 We collected data in two independent sets of experiments. We loaded *E. coli* K12-derived MG1655 strain  
102 cells into a designed microfluidic (PDMS) chip (Wang et al. 2010, Gasset-Rosa et al. 2014, Jouvet et al.  
103 2017) from an exponentially growing culture in supplemented minimum media M9. During each  
104 experiment, we acquired 77 hours of time lapse phase-contrast imaging (15 frames/hour for each of the  
105 2x44 fields followed) using a temperature-controlled inverted microscope, at 43°C with an accuracy of  
106 the temperature control at the chip of  $\pm 0.1^\circ\text{C}$  (note within the chip temperature should be even more  
107 closely controlled due to some buffering of the chip). We used 43°C to accelerate the aging process and  
108 thereby shorten the time the system needed to run under stable conditions. Such stability was particularly  
109 important to accurately track late daughter and second generation late daughter cells. Increasing  
110 temperature up to 43 °C scales senescence patterns, but does not alter the shape of patterns (Jouvet &

111 Steiner unpublished). At 44 °C patterns got unstable and cells were not viable over longer time periods  
112 (results not presented). The rod-shaped bacteria cells grew in dead end side channels of a microfluidic  
113 chip, with the focal cells trapped at the end of the side channels, and we tracked them over their lifespan  
114 (Fig. 1; movie S1). We used customized image analysis to generate the demographic data (lifespan, cell  
115 elongation rate, cell size, and time of each division).

116

117 We assured by starting the experiments with exponentially growing cells that the initial loaded cells are  
118 descendants of young mothers (i.e. they are early daughter cells) (Fig. S1). At the end of their lives, these  
119 early daughter cells produced a last daughter (late daughters) that then became the next bottom-most cell  
120 trapped at the end of the respective growth channel. Therefore, we could directly compare mother and  
121 daughter cells. Note that the late daughters are not born at the same time (main text Fig. 2 E, F). The late  
122 daughter cells produced another generation of late daughter cells at the end of their lives (second  
123 generation late daughter cells) for which the results are shown in Fig. S2-8, Table S1-3. Analysis on the  
124 empirical data were done in program R (R Core Team 2016) using general linear, generalized linear, and  
125 non-linear models. Models were selected based on information criteria (AIC) (Burnham and Anderson  
126 1998) or based on differential evolution algorithm for global optimization (R package DEoptim).

127

128 Simulations and extending random deterioration models.

129 For the extended random deterioration model, we first estimated parameters by fitting a fixed frailty  
130 model — a Gamma-Gompertz-Makeham (GGM) model — to the observed survival data of the early  
131 daughter cells (Yashin et al. 1994, Missov and Vaupel 2015). We then translated these fitted GGM model  
132 parameters to an extended random deterioration process model, an extended LeBras type deterioration  
133 model (Le Bras 1976). In doing so, we took advantage of mathematical similarities between the two

134 types of models, even though they are biologically distinct (Yashin et al. 1994, Missov and Vaupel 2015).  
135 With these random deterioration model parameters we could estimate the probability matrix of an  
136 individual being at stage  $i$  at age  $x$ . Microsimulations based on these models provided stage at death  
137 distribution. For the late daughters, we assumed that they are born at a scaled version of the same damage  
138 stage in which their mothers died. We also assumed that late daughters accumulate damage at the same  
139 rates as early daughters do, i.e. same probabilities to transition to a higher damage state of early and late  
140 daughters. We further assumed that the amount of accumulated damage in late daughters had the same  
141 effect on mortality than on early daughters, that is, early and late daughter cells are not fundamentally  
142 different except that late daughters are born in different damage stages, while early daughters start their  
143 lives without damage, but the baseline mortality (Makeham term) can be interpreted as some starting  
144 level of damage even for early daughters. Our model simplifies the biological system substantially in as  
145 much as no repair of damage or purging of damage through asymmetric division at cell fission is  
146 considered. Damage accumulates unidirectionally, mortality increases exponentially with accumulated  
147 damage, and each cell suffers from an age-independent baseline mortality risk (Makeham term).  
148  
149

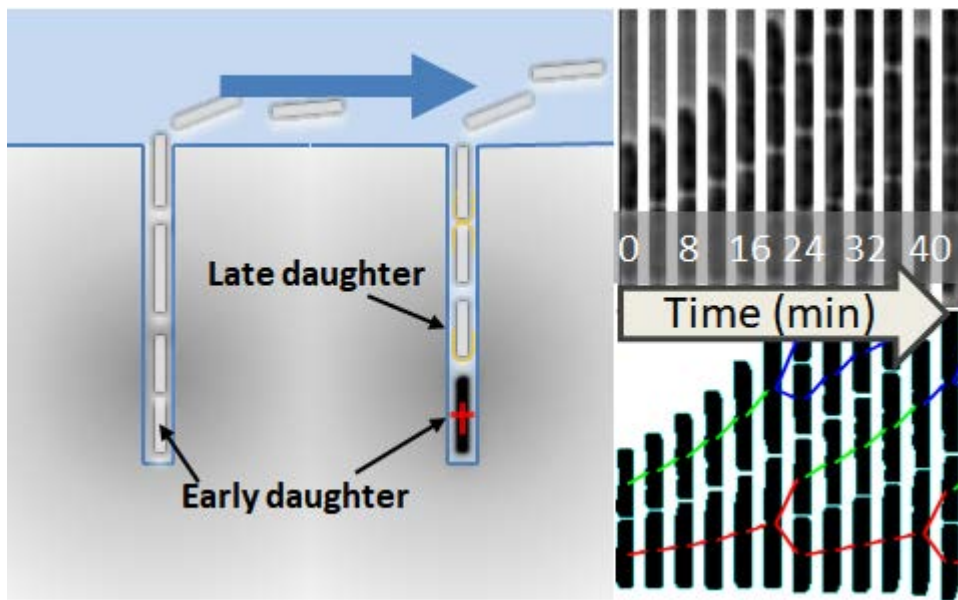

150

151 Fig. 1: Left panel: Overview sketch of the microfluidic device with dead-end side channels and the main  
152 laminar flow channel where the media is flushed through. The early daughters (founding initial loaded  
153 mothers) are the bottommost cells of the dead-end channels. Their daughters (new pole progenitor cells)  
154 are located closer to the main laminar flow channel and have more recent poles. When the mother (early  
155 daughter) dies (side channel on the right), its last daughter (1<sup>st</sup> generation late daughter) is then tracked  
156 throughout its life. Accordingly, 2<sup>nd</sup> generation late daughter cells are tracked once their mother (1<sup>st</sup>  
157 generation late daughter) dies. Right top and bottom panel: Phase contrast time sliced (4 min intervals)  
158 side channel images with initial loaded early daughter at the bottom (old pole progenitor). Growth (cell  
159 elongation) and division can be tracked throughout their life as depicted in the segmented cell lineages  
160 (bottom right panel). See also movie S1.

161

## 162 **Results and Discussion**

### 163 Chronological aging in *E. coli*



164 In our experiments, we followed by automated time-lapse microscopy 516 early daughters throughout  
165 their lives as they divide and age in microfluidic dead-end channels (Fig. 1). We also followed two  
166 generations of late daughters of these 516 early daughters and recorded each cells growth rate and  
167 lifespan. In this, we reveal classical senescence patterns of a decrease in reproduction (Fig. 2A, B) —  
168 indicated by decreased cell elongation and increased size at division with age (Fig. S2, Table S1) — for  
169 both early and late daughters (Figure 2A, B). The observed senescence patterns (Fig. 2C, D) describe  
170 chronological aging in *E. coli* and support previous studies on replicative senescence (time counted as  
171 number of divisions) in this species (Lindner et al. 2008, Wang et al. 2010) (Fig. S2 & Fig. S4). The  
172 main result highlights that early daughters and late daughters differ fundamentally in their senescence  
173 pattern, even though they are isogenic and grown in a highly controlled environment. Only the early  
174 daughters exhibit the classical senescence pattern, marked by an early exponential increase of the  
175 probability of death followed by a later age mortality plateau. Late daughters have the same probability  
176 of death across most of their lives, i.e. no senescence is observed at the population level. Only late in life  
177 does mortality increase, but this increase is largely driven by only one data point, the one for the last age  
178 class (>30h) and is accompanied by increased uncertainty due to small sample size at that age. Such a  
179 plateau, exhibited by the early daughters — recurrent in many higher organisms including humans  
180 (Vaupel et al. 1998) — has not been previously shown for bacteria, potentially indicating deep-rooted  
181 features of aging and senescence. In yeast, ambiguous results on senescence patterns have been described  
182 (Minois et al. 2005, Denoth Lippuner et al. 2014).

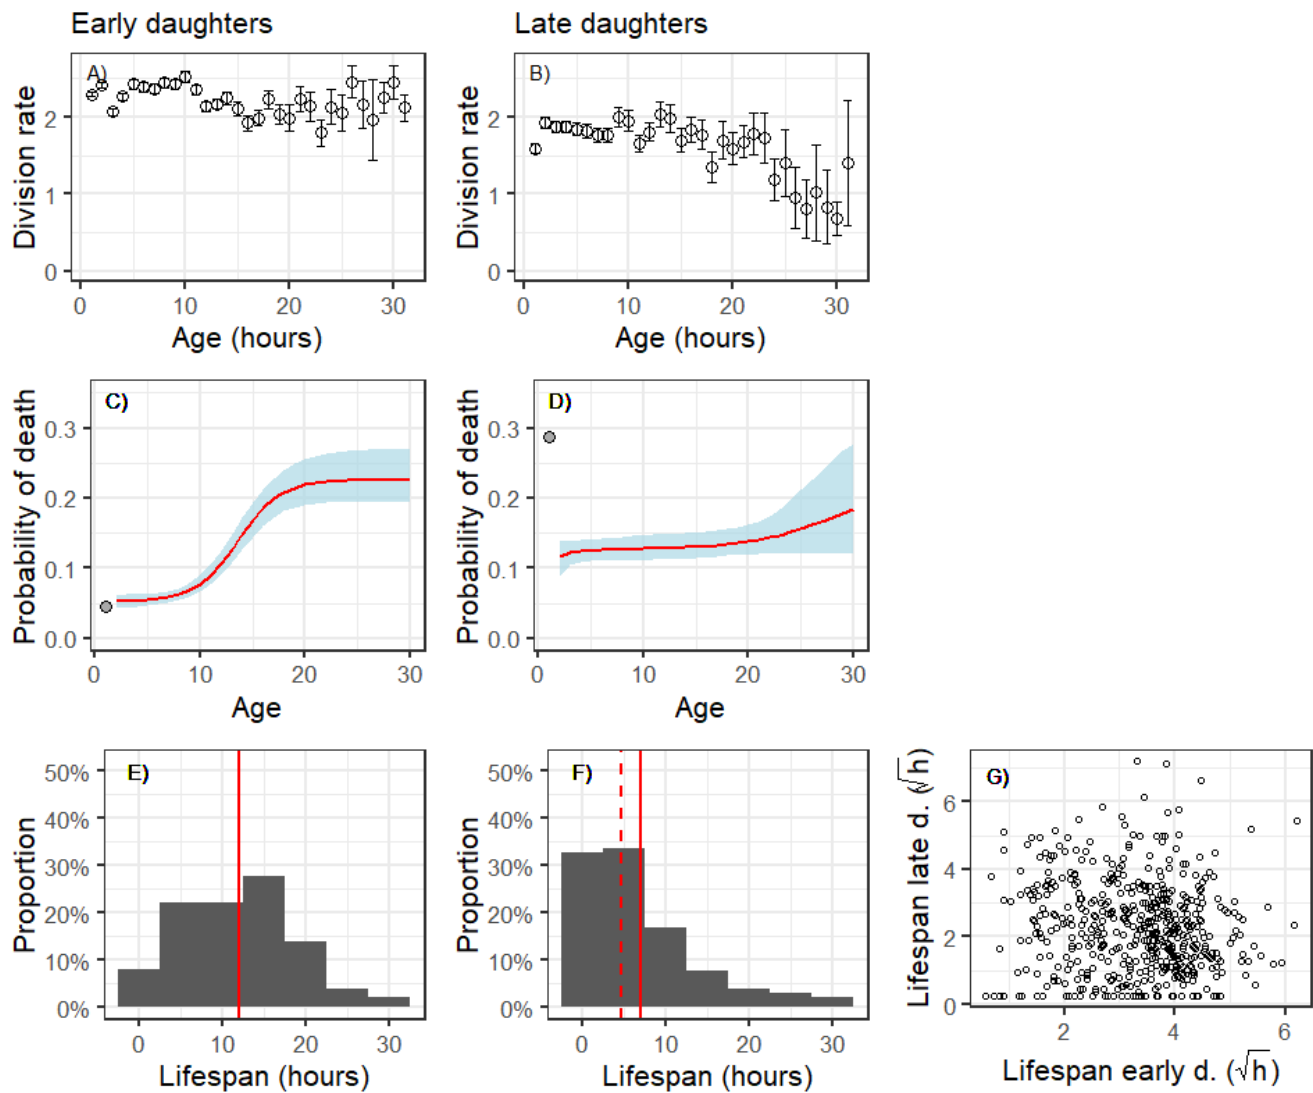

183

184 Fig. 2: Division rate (divisions per hour) (A, B) and probability of death per hour (C, D) with increasing  
185 age, as well as lifespan distribution (in hours) (E, F) of isogenic *E. coli* cells grown under highly  
186 controlled environmental conditions in a microfluidic device (Fig. 1, movie S1). Age patterns are shown  
187 for early daughters (A, C, E; N=516), and late daughters (B, D, F; N=516). Late daughters are the last  
188 offspring of the founding early daughters. The correlation of early daughter's lifespan (mothers' lifespan)  
189 (square root transformed for better visibility; N=516) versus the lifespan of their last daughter cell (late  
190 daughter cells; N=516) is shown in panel (G). For (A, B) hourly means  $\pm$  standard errors are plotted, for

191 (C, D) the fitted regression  $\pm$  95% confidence intervals are plotted (confidence intervals are estimated  
192 based on individual level data S11). The fitted regression (red lines) are likelihood optimization for  
193 Gamma-Gompertz-Makeham functions and relate closely to the modeling approach we took below (C,  
194 D, see also Fig. 3, simulations below, and S11; Table S1, Table S2 for statistical testing) (Burnham and  
195 Anderson 1998). The grey points in panel C, D, mark average first hour probability of death which have  
196 been excluded from the modeling. For lifespan distributions (E, F), mean and median are marked by solid  
197 and dashed lines respectively. For patterns of the second generation late daughters, see Table S2, Table  
198 S3, Table S4, and Fig. S3, Fig. S7, Fig. S8, Fig. S9, Fig. S10, Fig. S11.

199

200 The probability of death of newborn late daughters ( $\leq 1$  hour, filled grey data point in Fig. 2D) drops  
201 after the first hour to a level that is lower than their long-lived mothers (early daughters above age 20)  
202 and then remains at that level throughout their lives. This drop in mortality early in life of late daughters  
203 suggests a damage purging effect (see below). Such a drop of mortality after birth might indicate  
204 heterogeneity among newborns amenable to evolutionary selective forces (Yashin et al. 1994), e.g.  
205 heterogeneity in maternally-transmitted damage between mothers and daughters. With increasing age we  
206 detected increased variance and increased uncertainty of parameter estimation (Fig. 2 A-E). Such  
207 increase is expected for age-structured demographic analyses and well understood for its declining  
208 number of individuals with age (Brillinger 1986, Klein and Moeschberger 2003, Scherbov and Ediev  
209 2011). The increase in variance is more pronounced for probabilities of death (Fig. 2 C, D) than for  
210 division rates (Fig. 2 A, B), because each individual dies only once while each individual divides multiple  
211 times throughout its life and hence division rates suffer less from smaller sample sizes. Binning over  
212 larger time spans or having an earlier open age bracket would diminish the effect of increased variance  
213 with age.

214

215 Damage accumulation and selection

216 If we assume, as in most physiological theories of aging, that accumulated damage is the determining  
217 factor for the probability of death, then the observed constant probability of death with age for older early  
218 daughters and the late daughters (Fig. 2C, D) indicates an equilibrium distribution of damage among  
219 individuals. Such equilibrium is realized at the population level while the individuals accumulate damage  
220 in a stochastic manner. It equilibrates on one hand the accumulation of new damage within individuals  
221 similar to processes described by random deterioration models (Weitz and Fraser 2001), and on the other  
222 hand, the intracellular repair of damage and purging of damage by two mechanisms. The first mechanism  
223 reduces damage within an individual by asymmetric division of damage at cell fission, which increases  
224 variance in damage among individuals (mother and daughters). The second mechanism selects against  
225 highly damaged cells, i.e. the most damaged cells of a population die, which lowers the average level of  
226 damage in the surviving population, and reduces the variance of damage among individuals (Evans and  
227 Steinsaltz 2007). Intriguingly, this equilibrium (plateau level) is lower for late daughters (Fig. 2D, see  
228 Table S3) than the late-age mortality plateau of the early daughters (Fig. 2C). This indicates — based on  
229 fixed frailty models (Missov and Vaupel 2015) — higher heterogeneity in transmitted damage of late  
230 daughters compared to early daughters. Such increased heterogeneity at birth predicts an earlier onset of  
231 selection against highly damaged cells which would explain why in our simulations (below) late  
232 daughters have on average less damage compared to early daughters at the plateau (see Fig. 3A, B, Fig.  
233 S10). Purging of damage through asymmetric division at cell fission has been shown in yeast, where late  
234 daughters showed reduced lifespan, but through further division and presumably damage dilution, the  
235 descendants of these late daughter yeast cells recovered high longevity (Kennedy 1994). This is also

236 reminiscent of asymmetric partition of protein aggregates in bacterial cells due to their passive  
237 accumulation in bacterial mother cells (Lindner et al. 2008, Coquel et al. 2013).

238

239 Stochastic variability in lifespan and lack of mother-daughter correlation of lifespan

240 We did not find any influence of the lifespan of the mothers on the lifespan of their (last) daughters (Fig.  
241 2G) (Table S6, Fig. S8). Since we are working with an isoclonal population we do not expect any genetic  
242 variability among mother-daughter pairs; therefore, we would not expect a genetically driven mother-  
243 daughter correlation of lifespan caused by additive genetic differences. However, non-genetic factors  
244 such as maternal transmitted damage would predict mother-daughter correlated lifespans except if i)  
245 daughters would be perfectly rejuvenated — all daughters would be born without damage (see also Fig.  
246 3E) —, or ii) if the transmission of damage to the daughter is independent of the amount of accumulated  
247 damage by the mother — the mother-daughter transmission of damage is stochastic. Since late daughters  
248 display higher probability of death from birth onwards (Fig. 2D), which is indicative of some maternally  
249 transmitted damage and obviously shows that late daughters are not perfectly rejuvenated, we can  
250 exclude the first explanation why a mother-daughter correlation of lifespan is lacking. This leaves the  
251 second explanation where the amount of damage transmitted from the mother to the daughter is stochastic  
252 and independent of the age of the mother. Early daughters seem to hold little or no damage at birth, since  
253 their mothers have not yet accumulated much damage, whereas the average late daughter seems to be  
254 born with some damage that raises its probability of death. The lack of a mother-daughter correlation of  
255 lifespan is also remarkable as it contrasts heritability of lifespan in humans and other complex organisms  
256 that show similar senescence patterns (Finch and Kirkwood 2000).

257

258 The lack of correlation between mother-daughter lifespan suggests that the assumed mother-daughter  
259 transmission of damage is predominantly stochastic. If damage accumulates stochastically within a cell  
260 over its life, long-lived mothers might have been lucky and accumulated damage at a lower rate than the  
261 average mother, but they still accumulate damage with increasing age. At age of death, long-lived  
262 mothers might have similar damage levels compared to short lived mothers. Short-lived mothers, which  
263 likely accumulated damage at an exceptional high rate, do not produce daughters with shorter life  
264 expectancy. Despite their difference in lifespan, neither long-lived nor short-lived mothers tend to  
265 transmit higher or lower amounts of damage to their daughters, otherwise we would find a negative or  
266 positive correlation in mother-daughter lifespan (Fig. 2G). Therefore, our observation that early  
267 daughters — which are assumed to hold little or no damage at birth — die at very different ages indicates  
268 that the process of damage accumulation within an individual appears to be stochastic and varies highly  
269 among individuals. Despite an isogenic population in a highly controlled homogeneous environment, we  
270 observe a high variation in lifespan and reproduction among individuals, both for early daughters  
271 (Median±stdev lifespan  $12 \pm 7$  hours, Coefficient of Variation, CV 0.57, Fig. 2E) (Fig. S7) and late  
272 daughters (Median±stdev  $5 \pm 7$ ; CV=1.01, Fig. 2F). Such high variation supports substantial influences  
273 of stochastic events in shaping lifespan.

#### 274 275 Modeling damage accumulation and asymmetric transmission of damage

276 To support our conclusions based on the empirical results and to gain a better understanding of the  
277 underlying stochastic processes that shape our observed senescence patterns, we extended random  
278 deterioration process models (e.g. random accumulation of damage, see details in Methods and SI1) (Le  
279 Bras 1976, Yashin et al. 1994, Evans and Steinsaltz 2007). Our extended model assumes that all cells  
280 accumulate damage unidirectionally at the same rate, i.e. cells move with equal probability to a higher

281 damage state, mortality increases exponentially with accumulated damage, and each cell suffers from an  
282 age-independent baseline mortality risk. We also assume that early daughters are born without damage  
283 (Fig. 3A). The results of our simulations show that with increasing age population level damage (and  
284 variance) slowly increases at early ages, accelerates after 10 hours and plateaus after 20 hours (Fig. 3A).  
285 These patterns in damage accumulation mirror the observed mortality patterns (Fig. 2C). Mortality  
286 plateaus, as observed for early daughters, can be explained by either fixed frailty, i.e. heterogeneity in  
287 damage stage at birth, or acquired heterogeneity throughout life (Vaupel and Yashin 1985, Yashin et al.  
288 1994, Weitz and Fraser 2001, Missov and Vaupel 2015). In our system heterogeneity in damage stage at  
289 birth seems to have little influence, at least for early daughter cells. Senescence is driven by an age  
290 independent baseline mortality and accrued damage as in random deterioration models (Le Bras 1976,  
291 Yashin et al. 1994, Weitz and Fraser 2001). This conclusion is supported by two results of our model.  
292 First, most early daughters die with no or very little damage (Fig. S10), and second, the observed survival  
293 patterns follow closely the survival curve of simulated cells that did not accumulate any damage  
294 throughout life (Fig. 3C).

295

296 Contrasting the assumption for the early daughter cells, in our simulation the average simulated late  
297 daughter is born with some damage (~24% are born without damage) (Yashin et al. 1994)(Fig. 3B). For  
298 the following results, it is important to note that this heterogeneity in damage at birth of late daughters is  
299 an underestimation since we do not include the exceptionally high first-hour mortality rate (grey filled  
300 data point in Fig. 2D) for the simulations. In our simulations the distribution of this damage at birth of  
301 the late daughters is related to the distribution of the accumulated damage at death of the early daughter  
302 cells (mothers of the late daughters, Fig. S10). For the simulations, we assumed that the mother to  
303 daughter transmission of damage is a fixed fraction of all the damage the mother accumulated over her

304 lifespan. Note, we only simulated a single binomial division, rather than multiple asymmetric fissions as  
305 others have done (Evans and Steinsaltz 2007). We computed the fixed fraction of damage transmission  
306 between mother and daughter by optimizing the survival pattern predicted by the simulations to the  
307 observed survival curves.

308

309 We found that the optimal (simulated) fixed fraction was at a low level of 0.07. This indicates a highly  
310 asymmetric division of damage between mothers and daughters. If damage transmission between  
311 mothers and daughters would be symmetrical (0.5), the predicted survival of the simulations (Fig. 3D  
312 hatched line) does not match the observed survival (Fig. 3D red line). For early daughters, the level of  
313 asymmetry makes little difference because most of them die with no or little accumulated damage (Fig.  
314 3C, Fig. S10). The predicted survival pattern of late daughters at older ages slowly converges to the  
315 simulated survival patterns of undamaged cells (outer right grey line) (Fig. 3D). Therefore, many cells  
316 in our simulation that survive to old ages hold little damage, which supports our interpretation of our  
317 experimental data that late daughter cells are born with diverse damage states, highly damaged cells are  
318 selected against, and at old ages, population-level survival patterns are strongly influenced by cells that  
319 have not accumulated much damage.

320

321 Similar selective effects have been described by population level demographic theories as  
322 heterogeneity's ruses, where selection among different damage stages (fixed frailty; i.e. heterogeneity in  
323 damage stage at birth) leads to diverse senescence patterns at the population level (Vaupel and Yashin  
324 1985). Compared to our simple model that only considers a single binary fission (branching) and suggests  
325 a strong asymmetry, more complex and realistic models that include multiple branching (fission) events  
326 show less extreme asymmetry at cell fission to be adaptive (Evans and Steinsaltz 2007). This difference



327 in optimal asymmetry between our simple and the more complex models can be understood in that the  
328 asymmetric transmission of damage is distributed over multiple fissions in the more complex models,  
329 while for our model it is concentrated at a single event. Even though the optimized fixed transmission  
330 fraction between mother and daughters of our model is low at 0.07, such a fixed fraction would lead to a  
331 correlation in lifespan between mother and daughters of about 0.25 (Fig. 3E). If different levels of fixed  
332 transmissions are simulated, correlation in lifespan between mother and daughters increases with  
333 increasing transmission. Only when there is no transmission of any damage (perfect rejuvenation of the  
334 daughters) we see no correlation in lifespan (Fig. 3E). The observed data does not support such  
335 correlation in lifespan (Fig. 2G), but also does not support perfect rejuvenation (Fig. 2C and D). Hence  
336 these simulations support our conclusion that the fraction of transmitted accumulated damage from  
337 mother to daughter at cell fission varies stochastically and is not fixed at a low level of 0.07 as our model  
338 assumes.  
339

340

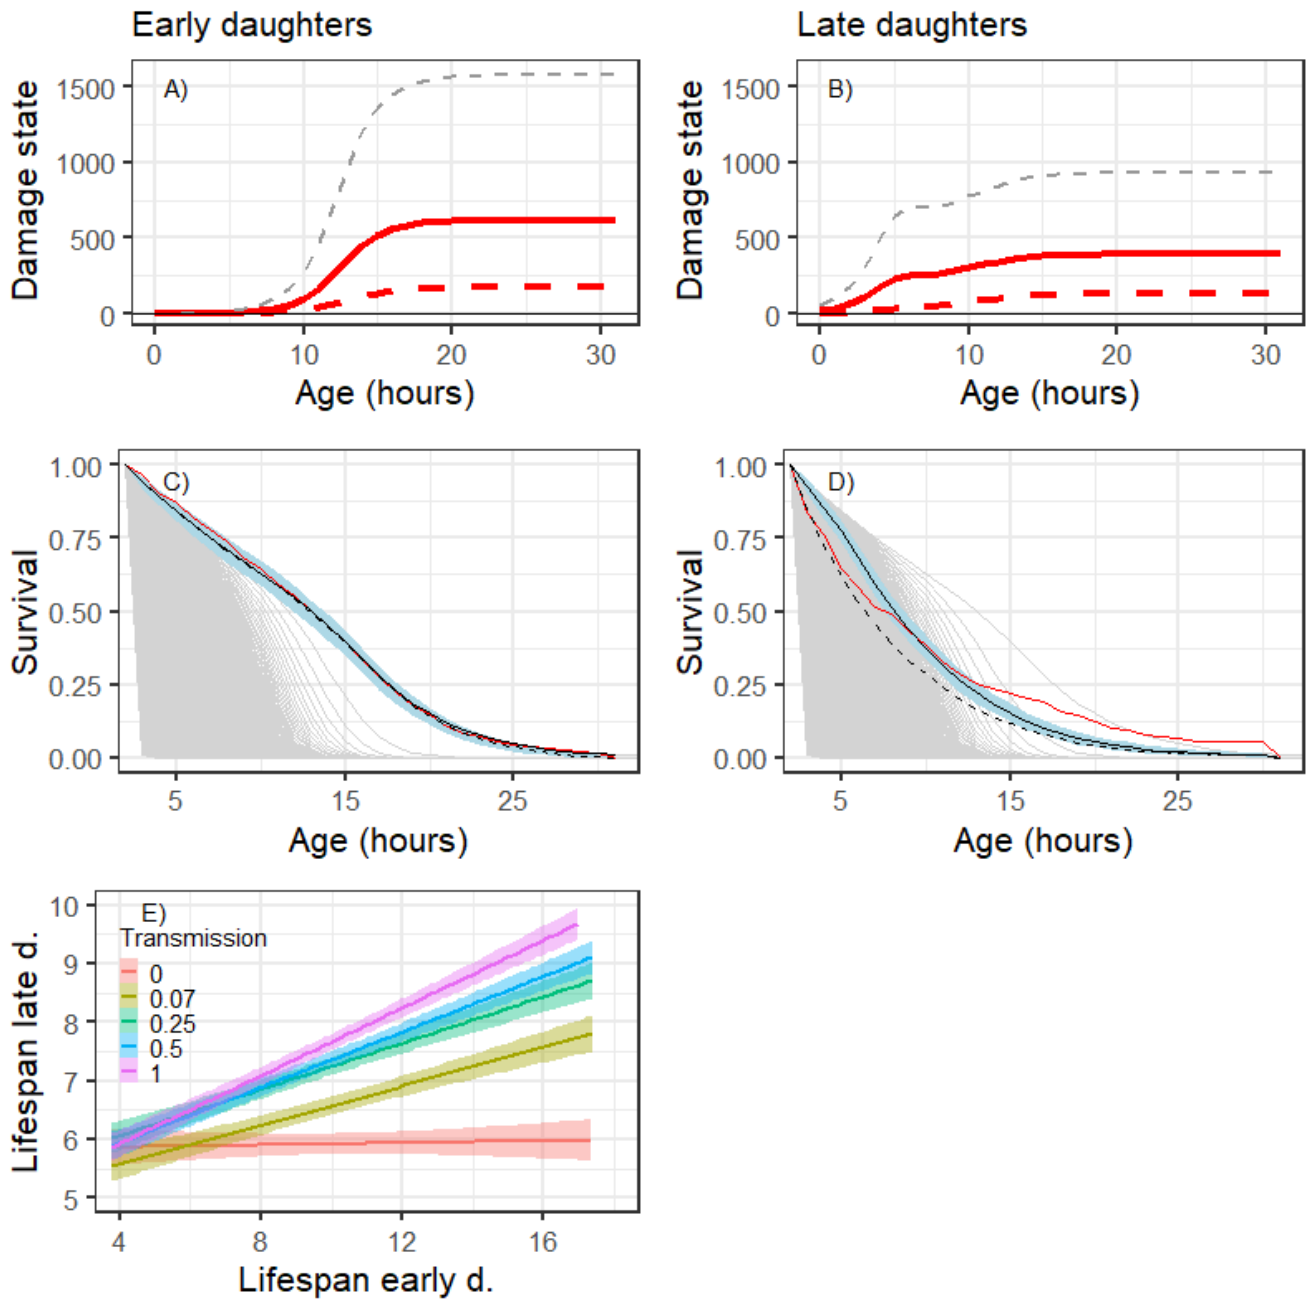

341

342 Fig. 3: Random deterioration model: Simulation results are shown of mean (red solid line, + SD grey  
343 hatched lines) and median (red hatched line) damage state with increasing age (A, B); observed  
344 experimental population level survival curves (red solid line; see also related probability of death Fig. 2

345 C, D and related observed distributions of death Fig. 2E, F), Gamma-Gompertz-Makeham simulated  
346 survival curves with symmetric damage transmission (hatched black line) as well as simulated  
347 asymmetric damage transmission of 7% (solid black lines  $\pm$  95% CI in blue) (C, D). Graphs are shown  
348 for early daughter cells (A, C) and late daughter cells (B, D). Thin grey lines in (C, D) depict expected  
349 survival curve of simulated cells with different fixed damage state: outermost (right) curve depicts the  
350 highest survival of simulated cells with no damage throughout their lives, most left survival curve depicts  
351 the lowest survival of simulated cells that were born with maximum damage level of 5000. Lifespan  
352 (square root transformed) of simulated 516 early daughter cells (mothers) versus the lifespan of their  
353 simulated last daughter cell (late daughter cells) with different levels of mother to daughter damage  
354 transmission (E). The different scenarios include the optimized fixed transmission level at 0.07 (forest  
355 green), a scenario for perfect rejuvenation, i.e. 0 transmission (red), 0.25 transmission (green), 0.5  
356 transmission, i.e. symmetric (equal) transmission between mother and daughter (blue), and transmission  
357 of all accumulated damage to the daughter (1) (pink). CI are shown for each correlation in lifespan  
358 between mothers and daughters as shaded areas.

359

360 In this study, our experimental setup limits our analysis to two extreme cases: early and late daughter  
361 cells (in fact the last daughter cells). We hypothesize that the results do not only hold for these two  
362 extremes but rather portray the extremes of a continuous process across different aged cells. Two  
363 observations support our claim: first, changes in mortality of early daughters (Fig. 2C) and age patterns  
364 in reproduction (Fig. 2A) are somewhat gradual (more so for survival than for reproduction), suggesting  
365 a gradual underlying mechanism; second, we do not observe a pronounced pattern just before death (Fig.  
366 S5 & Fig. S6, Table S5). Such a pattern would be expected if the last daughters are exceptional because

367 their mothers are approaching death, for instance in the way as predicted under terminal investment  
368 theories (Clutton-Brock 1984).

369

370 Two stochastic processes shape diverse senescence patterns

371 We conclude that the diverse senescence patterns, including the classical senescence pattern of a  
372 mortality plateau, are determined by two stochastic processes that relate to underlying (damage) states  
373 and only indirectly to age (Yashin et al. 1994, Wachter 1999, Weitz and Fraser 2001, Evans and Steinsaltz  
374 2007). The primary process is a random deterioration process, e.g. the stochastic accumulation of damage  
375 throughout life, and the secondary process involves the stochastic transmission of damage from the  
376 mother to their daughters at cell fission. This transmitted damage or some other unknown aging factor  
377 increases the probability of death but is “non-heritable” as we show by the lack of correlation between  
378 mother and daughter lifespan (Yashin et al. 1994, Wachter 1999, Weitz and Fraser 2001, Evans and  
379 Steinsaltz 2007). Not only additive genetic variation but also other commonly assumed drivers of  
380 senescence, such as epigenetic variability, age itself, or the (extrinsic) environment can be ruled out as  
381 major players in our study. If epigenetic variability had a significant influence, a positive correlation  
382 among mother and daughter lifespan would be seen. If chronological age determined senescence, early  
383 and late daughter cells would show similar mortality patterns, hence senescence is rather driven by stage  
384 dynamics than by chronological age. The highly controlled microfluidic system creates a uniform  
385 environment and hence we can exclude extrinsic environmental drivers; this does not imply that  
386 senescence patterns do not differ under different environmental conditions, we just investigated only one  
387 specific environment. For instance, under complex media variance in division size and related division  
388 rate is increased compared to the minimum medium we used (Gangan and Athale 2017). Minimum  
389 medium also decreases the rate of filamentation, a stress response that causes continued cell elongate

390 without dividing. Recovery of filamentous cells is rarely observed under minimum medium but frequent  
391 under complex medium (Wang et al. 2010) (see also SI). The near identical conditions cells experience  
392 in the microfluidic system decreases environmental variability compared to naturally experienced micro-  
393 habitats. The laminar flow provides large amounts of fresh media that constantly diffuses within seconds  
394 into the dead-end side channels and therefore prohibits built-up of micro-environmental-niches. Though,  
395 such micro-environments (e.g. biofilms) are characteristic for the natural conditions in the guts of the  
396 mammalian hosts most *E. coli* live and have evolved under. The microfluidic system we use largely  
397 prevents cell-to-cell contact and chemical communication among cells that can influence population  
398 growth (Aoki et al. 2005). The highly controlled conditions therefore lowers phenotypic variability  
399 compared to natural conditions. To what degree senescence patterns are altered by the environment  
400 remains to be explored. Temperature seem to conserve the shape of senescence patterns and simply scales  
401 patterns differently, whereas nutrient concentrations and nutrient source might alter shapes as has been  
402 found in other organisms (Stroustrup et al. 2016)(Steiner unpublished).

403

404 Our findings indicate that two simple stochastic processes can create complex senescence patterns. Easily  
405 understood, simplistic, and plausible arguments behind evolutionary theories of aging might lure readers  
406 into the misconception that chronological age in itself plays an important role in senescence. Such  
407 simplistic assumptions of age-specific drivers must be approached with caution and seem not applicable  
408 to this study. Selective forces likely decline with time in our system, but the decline might be dominated  
409 by underlying stage dynamics. Selection on heterogeneity among individuals is rather generated by such  
410 stage dynamics than by increasing chronological age. In this sense, selective forces and their decline vary  
411 considerably among individuals, even though genetic load that relates to the accumulation of deleterious  
412 mutations should be negligible in an isoclonal population as ours. The substantial effect of stochastic

413 events on life histories is also indicated by the large variability in life histories despite excluding any  
414 genetic or environmental variability. Such large stochastic variation supports arguments behind neutral  
415 theories of life history (Steiner and Tuljapurkar 2012) that suggest that stochastic variability can account  
416 for substantial fractions of the total variability in fitness components. Our interpretation of stochastic  
417 events determining individual life courses is consistent with findings of significant stochastic influences  
418 at the molecular (Elowitz et al. 2002) and protein level (Tyedmers et al. 2010, Balázsi et al. 2011) and  
419 adds to the growing interest in such phenotypic heterogeneity and individuality (Wolf et al. 2007,  
420 Davidson and Surette 2008, Ackermann 2015).

421

422 Future challenges will include determining whether these stochastic processes are neutral or adaptive,  
423 and what drives their evolution (Steinsaltz and Evans 2004, Kærn et al. 2005, Norman et al. 2015, Vera  
424 et al. 2016). For the basic aging processes that drive senescence, the causal relationships that drive age  
425 patterns are currently unknown (Lindner and Demarez 2009, López-Otín et al. 2013). The complex  
426 senescence patterns found in this study of a simple model organism under highly controlled conditions  
427 emphasizes the challenges to quantify contributions of well-defined determinants of aging in the complex  
428 systems on which most aging research is focused (López-Otín et al. 2013). Comparing mean  
429 characteristics of differently aged individuals as frequently done in aging research might hold limited  
430 insights in system where determining stages are likely highly dynamic. In light of the growing evidence  
431 that stochastic processes can have cascading effects across all levels of higher organisms (Finch and  
432 Kirkwood 2000, Elowitz et al. 2002, Balázsi et al. 2011) new avenues in aging research may require a  
433 shift towards the underlying stochastic processes that drive such stage dynamics in simple systems like  
434 bacteria and perhaps beyond. Identifying the underlying currently unknown (damage) states remains  
435 another challenge that we believe requires a combined quantitative demographic and mechanistic

436 approach, because of the high level of stochastic influences. Promising steps in such directions have been  
437 initiated by theoretically exploring stage-specific alleles shaping senescence patterns (Wachter et al.  
438 2014) and by exploring transcription factor signal dynamics at the single cell level across increasing parts  
439 of the lifespans of many individuals (Norman et al. 2013).

440

441

442

#### 443 **Acknowledgements**

444 We thank D.A. Roach, D. Steinsaltz, T. Coulson, Y. Yang and S. Tuljapurkar for discussions and  
445 comments.

446

#### 447 **References**

- 448 Ackermann, M. 2015. A functional perspective on phenotypic heterogeneity in microorganisms. - Nat.  
449 Rev. Microbiol. 13: 497–508.
- 450 Ackermann, M. et al. 2003. Senescence in a bacterium with asymmetric division. - Science 300: 1920.
- 451 Ackermann, M. et al. 2007. On the evolutionary origin of aging. - Aging Cell 6: 235–44.
- 452 Aoki, S. K. et al. 2005. Contact-Dependent Inhibition of Growth in Escherichia coli. - Science (80- ).  
453 in press.
- 454 Balázsi, G. et al. 2011. Cellular decision making and biological noise: from microbes to mammals. -  
455 Cell 144: 910–925.
- 456 Blattner, F. R. 1997. The Complete Genome Sequence of Escherichia coli K-12. - Science (80- ). 277:  
457 1453–1462.
- 458 Brillinger, D. R. 1986. A Biometrics Invited Paper with Discussion: The Natural Variability of Vital  
459 Rates and Associated Statistics. - Biometrics 42: 693.
- 460 Burnham, K. and Anderson, D. R. 1998. Model selection and multimodel inference : a practical  
461 information-theoretic approach. - Springer.
- 462 Caswell, H. 2001. Matrix population models: construction, analysis, and interpretation. - Sinauer  
463 Associates.
- 464 Charlesworth, B. 1994. Evolution in age-structured populations. - Cambridge University Press.
- 465 Clutton-Brock, T. 1984. Reproductive effort and terminal investment in iteroparous animals. - Am.  
466 Nat. 123: 212–229.
- 467 Coquel, A.-S. et al. 2013. Localization of protein aggregation in Escherichia coli is governed by

- 468 diffusion and nucleoid macromolecular crowding effect. - *PLoS Comput. Biol.* 9: e1003038.
- 469 Coulson, J. C. and Fairweather, J. A. 2001. Reduced reproductive performance prior to death in the  
470 Black-legged Kittiwake: senescence or terminal illness? - *J. Avian Biol.* 32: 146–152.
- 471 Davidson, C. J. and Surette, M. G. 2008. Individuality in Bacteria. - *Annu. Rev. Genet.* 42: 253–268.
- 472 Denoth Lippuner, A. et al. 2014. Budding yeast as a model organism to study the effects of age. -  
473 *FEMS Microbiol. Rev.* 38: 300–25.
- 474 Elowitz, M. B. et al. 2002. Stochastic gene expression in a single cell. - *Science* (80-. ). 297: 1183–  
475 1186.
- 476 Evans, S. N. and Steinsaltz, D. 2007. Damage segregation at fissioning may increase growth rates: a  
477 superprocess model. - *Theor. Popul. Biol.* 71: 473–90.
- 478 Finch, C. and Kirkwood, T. B. 2000. *Chance, Development, and Aging*. - Oxford University Press.
- 479 Gangan, M. S. and Athale, C. A. 2017. Threshold effect of growth rate on population variability of  
480 *Escherichia coli* cell lengths. - *R. Soc. open Sci.* 4: 160417.
- 481 Gasset-Rosa, F. et al. 2014. Direct assessment in bacteria of prionoid propagation and phenotype  
482 selection by Hsp70 chaperone. - *Mol. Microbiol.* 91: 1070–87.
- 483 Hamilton, W. D. 1966. The moulding of senescence by natural selection. - *J. Theor. Biol.* 12: 12–45.
- 484 Jagers, P. 1978. Balanced exponential growth: what does it mean and when is it there? - In:  
485 *Biomathematics and cell kinetics*. Elsevier, pp. 21–29.
- 486 Johnson, L. R. and Mangel, M. 2006. Life histories and the evolution of aging in bacteria and other  
487 single-celled organisms. - *Mech. Ageing Dev.* 127: 786–93.
- 488 Jones, O. R. et al. 2014. Diversity of ageing across the tree of life. - *Nature* 505: 169–73.
- 489 Jouvét, L. et al. 2017. Demographic variability and heterogeneity among individuals within and among  
490 clonal bacteria strains. - *Oikos* in press.
- 491 Kærn, M. et al. 2005. Stochasticity in gene expression: from theories to phenotypes. - *Nat. Rev. Genet.*  
492 6: 451–464.
- 493 Kennedy, B. K. 1994. Daughter cells of *Saccharomyces cerevisiae* from old mothers display a reduced  
494 life span. - *J. Cell Biol.* 127: 1985–1993.
- 495 Kirkwood, T. B. L. 2005. Understanding the odd science of aging. - *Cell* 120: 437–47.
- 496 Kirkwood, T. B. L. et al. 2005. What accounts for the wide variation in life span of genetically identical  
497 organisms reared in a constant environment? - *Mech. Ageing Dev.* 126: 439–443.
- 498 Klein, J. P. and Moeschberger, M. L. 2003. *Survival analysis : techniques for censored and truncated*  
499 *data*. - Springer.
- 500 Le Bras, H. 1976. Lois de mortalité et age limite. - *Population (Paris)*. 33: 655–691.
- 501 Lindner, A. B. and Demarez, A. 2009. Protein aggregation as a paradigm of aging. - *Biochim. Biophys.*  
502 *Acta* 1790: 980–96.
- 503 Lindner, A. B. et al. 2008. Asymmetric segregation of protein aggregates is associated with cellular  
504 aging and rejuvenation. - *Proc. Natl. Acad. Sci. U. S. A.* 105: 3076–81.
- 505 López-Otín, C. et al. 2013. The hallmarks of aging. - *Cell* 153: 1194–217.
- 506 Mattick, K. et al. 2003. Morphological changes to *Escherichia coli* O157:H7, commensal *E. coli* and  
507 *Salmonella* spp in response to marginal growth conditions, with special reference to mildly  
508 stressing temperatures. - *Sci. Prog.* 86: 103–113.
- 509 Medawar, P. B. 1952. An unsolved problem of biology. - In: *Uniqueness of the Individual*. H. K.  
510 Lewis, in press.
- 511 Minois, N. et al. 2005. Advances in measuring lifespan in the yeast *Saccharomyces cerevisiae*. - *Proc.*  
512 *Natl. Acad. Sci. U. S. A.* 102: 402–6.



- 513 Missov, T. I. and Vaupel, J. W. 2015. Mortality Implications of Mortality Plateaus. - *SIAM Rev.* 57:  
514 61–70.
- 515 Norman, T. M. et al. 2013. Memory and modularity in cell-fate decision making. - *Nature* 503: 481–  
516 486.
- 517 Norman, T. M. et al. 2015. Stochastic Switching of Cell Fate in Microbes. - *Annu. Rev. Microbiol.* 69:  
518 381–403.
- 519 R Core Team, R. A. language and environment for statistical computing. 2016. R: A language and  
520 environment for statistical computing. (RDC Team, Ed.). - *R Found. Stat. Comput.* 1: 409.
- 521 Scherbov, S. and Ediev, D. 2011. Significance of life table estimates for small populations: Simulation-  
522 based study of estimation errors. - *Demogr. Res.* 24: 527–550.
- 523 Steiner, U. K. and Tuljapurkar, S. 2012. Neutral theory for life histories and individual variability in  
524 fitness components. - *Proc. Natl. Acad. Sci. U. S. A.* 109: 4684–9.
- 525 Steinsaltz, D. and Evans, S. N. 2004. Markov mortality models: implications of quasistationarity and  
526 varying initial distributions. - *Theor. Popul. Biol.* 65: 319–37.
- 527 Stewart, E. J. et al. 2005. Aging and death in an organism that reproduces by morphologically  
528 symmetric division. - *PLoS Biol.* 3: e45.
- 529 Stroustrup, N. et al. 2016. The temporal scaling of *Caenorhabditis elegans* ageing. - *Nature* 530: 103–  
530 107.
- 531 Tyedmers, J. et al. 2010. Cellular strategies for controlling protein aggregation. - *Nat. Rev. Mol. cell*  
532 *Biol.* 11: 777–788.
- 533 Vaupel, J. W. and Yashin, A. I. 1985. Heterogeneity's Ruses: Some Surprising Effects of Selection on  
534 Population Dynamics. - *Am. Stat.* 39: 176.
- 535 Vaupel, J. W. et al. 1998. Biodemographic Trajectories of Longevity. - *Science* (80-. ). 280: 855–860.
- 536 Vaupel, J. W. et al. 2004. The case for negative senescence. - *Theor. Popul. Biol.* 65: 339–351.
- 537 Vera, M. et al. 2016. Single-Cell and Single-Molecule Analysis of Gene Expression Regulation. -  
538 *Annu. Rev. Genet.* 50: 267–291.
- 539 Wachter, K. W. 1999. Evolutionary demographic models for mortality plateaus. - *Proc. Natl. Acad. Sci.*  
540 96: 10544–10547.
- 541 Wachter, K. W. et al. 2014. Evolutionary shaping of demographic schedules. - *Proc. Natl. Acad. Sci. U.*  
542 *S. A.* 111 Suppl: 10846–53.
- 543 Wang, P. et al. 2010. Robust growth of *Escherichia coli*. - *Curr. Biol.* 20: 1099–103.
- 544 Weitz, J. and Fraser, H. 2001. Explaining mortality rate plateaus. - *Proc. Natl. Acad. Sci. U. S. A.* 98:  
545 15383–15386.
- 546 Williams, G. C. 1957. Pleiotropy, Natural Selection, and the Evolution of Senescence. - *Evolution* (N.  
547 Y). 11: 398.
- 548 Williams, G. C. 1966. *Adaptation and natural selection : a critique of some current evolutionary*  
549 *thought.* - Princeton Univeristy Press.
- 550 Wolf, M. et al. 2007. Life-history trade-offs favour the evolution of animal personalities. - *Nature* 447:  
551 581–584.
- 552 Yashin, A. I. et al. 1994. A duality in aging: the equivalence of mortality models based on radically  
553 different concepts. - *Mech. Ageing Dev.* 74: 1–14.
- 554

555 **Supporting information SI1**

556

557 **Strains and growth conditions**

558 We fabricated the microfluidics chips as previously described (Gasset-Rosa et al. 2014). We grew *E. coli*  
559 K12 MG1655 (Blattner 1997) strain derivative (intC::pSulA-yfp) cells at 43°C in filtered minimal  
560 medium supplemented with 0.4% Glucose and 0.2% Casamino Acids (hereafter M9). We diluted 100µl  
561 of the overnight culture into 50ml of M9 and then grew it at 43°C to exponential growth phase (OD600  
562 ~0.2). We centrifuged the cells and resuspended the cell pellet in 100µl of M9 to load them into the chip  
563 by injection into the main (feeding) channel followed by centrifugation (15 minutes at ~168g). We  
564 applied a continuous laminar flow (2.7ml/h) of M9 supplemented with 1.5% Polyethylene Glycol (PEG  
565 P3015 Sigma Aldrich) through the main channel throughout the experiment. The temperature was kept  
566 constant at 43°C (see below).

567

568 **Time-lapse imaging**

569 We followed bacterial growth in the microfluidics chip by phase-contrast time-lapse imaging at a rate of  
570 4min/frame using a MetaMorph (Molecular Devices)-controlled inverted Nikon microscope (Eclipse Ti,  
571 100xobjective, CoolSNAP HQ2 camera) with a temperature-control chamber (Live Imaging Services).  
572 We continuously scanned 44 positions, each comprising 18 channels, for 77 hours, in two independent  
573 experimental sets.

574

575 **Image analysis**

576 We used a custom image analysis to segment all cells within the side channels per frame, the software  
577 measured the cells' location and size within the time series and generated cell lineages. To this end, phase

578 contrast time-lapse images were lowpass-filtered and background flattened (MetaMorph Molecular  
579 Devices software) to increase contrast. We further processed the images by a customized ImageJ plugin  
580 for cell segmentation to crop each of the growth channels, stabilize the time sequenced images, adjust  
581 the brightness and to create a binary image by thresholding and filtering (median filter). Finally, the  
582 ImageJ plugin water-sheds the time sliced images. We then applied a final round of segmentation in  
583 Matlab by correcting errors in segmentation by checking for minimum (0.8) and maximum (1.4) cell  
584 elongation rates for each cell (size time-4 min, size time+4min). This way, we recorded for any time  
585 points (at 4 minute intervals) the exact location of a cell in the side channel (the pixel coordinate of the  
586 center of mass of the cell area), the side channel of the cell, and if a cell divided. By the position within  
587 the side channel we determined which cell was the mother (old pole progenitor) cell (bottommost cell),  
588 their most recent daughter (new pole progenitor) cell and so forth. We measured the length of a cell as  
589 the largest distance of the rod shaped cell in the orientation of the side channel. We applied a minimum  
590 “cell length” of  $\sim 1\mu\text{m}$  to exclude artefacts originating mainly from small deformations in the growth  
591 channels, or some shadows/reflections generated at the dead end of the growth channel.

592

### 593 **Age at death**

594 We defined age at death as the time when a cell stopped growing and dividing for at least one hour and  
595 20 min. None of the cells divided after such a long division arrest or resumed growth.

596

### 597 **Early and late daughter cells**

598 We defined the early daughter population as the cells that were initially loaded into the microfluidic chip  
599 and settled at the dead-end of the side channels. They originated largely from young mothers because the  
600 population was in exponential growth phase when we loaded cells into the chip (Jagers 1978). The age

601 distribution of these early daughter cells is, because of the exponential growth phase, negatively  
602 exponentially distributed. We show their expected age distribution in Fig. S1, based on a Leslie matrix  
603 generated from the survival and division rates of the early daughters (Fig. 2A & C). Due to the  
604 exponential growth phase, we assume a stable age distribution (the right eigenvector corresponding to  
605 the dominant eigenvalue of the Leslie matrix) (Caswell 2001). We tracked these early daughter cells to  
606 the end of their lives (Fig. 1, movie S1). The last daughters that were produced by these early daughter  
607 cells are the late daughter population. These late daughters are all of age zero but originate from mother  
608 cells (the early daughters) that had accumulated damage over their lives, and that were only one division  
609 from dying. We again tracked these late daughters throughout their lives. We focus mainly on these first  
610 two types of cells (early and late daughters), though as expected, the next generation of late daughter  
611 cells (second generation late daughters) follow the late daughter patterns (Fig. S4-6).

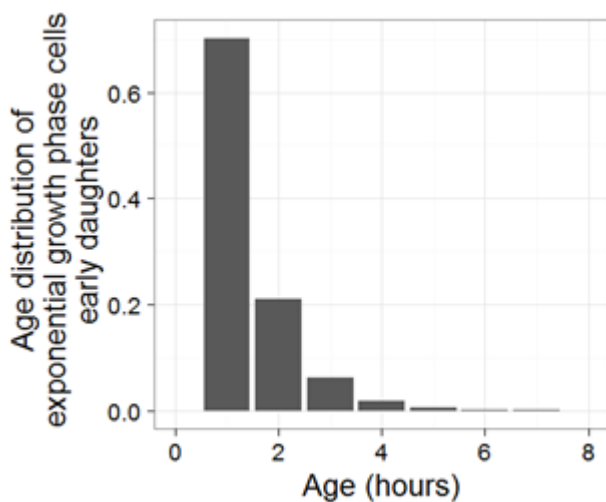

612  
613 Fig. S1: Expected (stable) age distribution (in hours) of early daughters (initial loaded cells), estimated  
614 from a Leslie matrix parameterized with the demographic rates of the early daughter cells. Due to the  
615 theory of stable age populations, the distribution of the ages of the mothers of these early daughters

616 should be exactly as the (stable) age distribution shown here of the initial loaded (early daughter cells)  
617 at the start of the experiments.

618

### 619 **Estimating demographic parameters**

620 Image analysis (see above) provided us the basis for estimating the age-specific demographic parameters:  
621 division rate, cell elongation rate, size at division, and survival rate. We excluded all cells that were not  
622 tracked throughout their lives. This concerned mostly cells that filamented (cell division arrested without  
623 growth arrest) and were flushed out of the side channels when they reached a size longer than 25  $\mu\text{m}$   
624 (length of the side channel). We also excluded all (early and late daughter) cells that died at chronological  
625 age 0 (never started to grow or divide). This was practiced because loading into the chip might be  
626 damaging and we wanted to exclude such death. This approach was conservative, because fewer early  
627 daughters never started growing or divided compared to late daughters (who could not have been  
628 damaged by the loading). We used data from 516 early daughters that produced 516 late daughters which  
629 in turns produced 298 (second generation) late daughters that were tracked throughout their lives.

630

### 631 **Statistical analysis**

632 We did the statistical analysis using the R software (R Core Team 2016). We estimated and plotted hourly  
633 rates for division rates, cell elongation, and cell size at division rather than rates on the 4 min intervals  
634 because data would be sparse for 4 min intervals at older ages. Already the hourly rates at old ages suffer  
635 from sparse estimates and increased uncertainty. We also clustered all data of ages beyond 30 h for the  
636 same reason. To guide statistical testing, we used model selection (Burnham and Anderson 1998) based  
637 on AIC (Akaike Information Criteria) and considered — as common practice — better support between  
638 models when the  $\Delta\text{AIC}$  was more than 2. For the parameter estimation of the GGM and extended random

639 deterioration models, we used the DEoptim R package and the optim function within the stats R package.  
640 We calculated the CI (Fig. 2 C & D) by bootstrapping 1000 times. This bootstrapping is based on  
641 individual level data not the hourly means Fig. 2 C, D. We choose such an likelihood based global  
642 optimization approach to closely relate to the GGM modeling approach we used for the simulations.  
643 Using model comparison (AIC) based on the hourly rates (results not shown) selects for models with  
644 sigmoidal shapes like the GGM likelihood optimization, i.e. an early exponential increase in mortality  
645 followed by a late age mortality plateau (Fig. 2 C). For early daughters, other exponential or linear  
646 functions receive less support. For late daughters model comparisons selected non-senescence (Fig. 2 D,  
647 flat mortality) over linear or exponential models. We did not test for any breakpoint models or step  
648 functions, since such models are not expected based on evolutionary theories of aging.

649

#### 650 **Lifespan distribution second generation late daughters**

651 In the main article, we focused on early and late daughter cells. Qualitatively, patterns of the second gen  
652 eration late daughters (the last daughters produced by the late daughters) correspond to those of their m  
653 others (the late daughters), though data becomes sparse uncertainty increases and some deviations occur  
654 . Fig. S7 illustrates lifespan distributions of the 298 second generation late daughters, their mothers (late  
655 daughters), and grandmothers (early daughters). Kolmogorov-Smirnov tests (two-sided) verifies that bo  
656 th lifespan distributions between early and late daughters ( $D = 0.3691$ ,  $p < 0.00001$ ), and early to secon  
657 d generation late daughters are significantly different ( $D = 0.4094$ ,  $p < 0.00001$ ), while those between la  
658 te daughters and second generation late daughters do not differ ( $D = 0.0973$ ,  $p = 0.1189$ ).

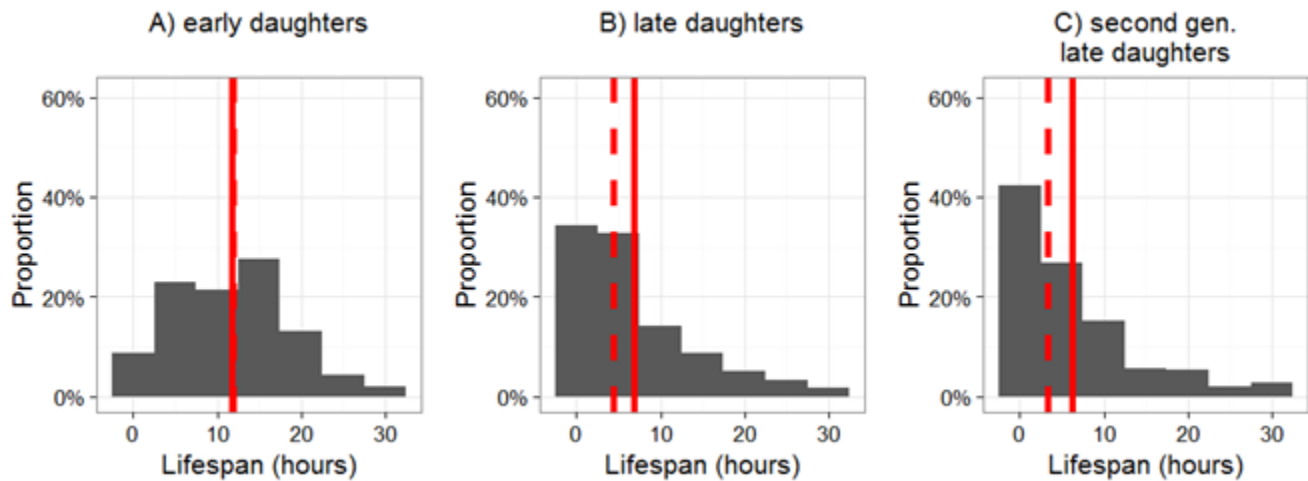

659

660 Fig. S7: Lifespan distribution (in hours) of isogenic *E. coli* cells grown under identical environmental  
661 conditions in a microfluidic device (Fig. S1). 1A – Founding early daughter cells (Median±stdev lifespan  
662  $12 \pm 6.8$  hours, Coefficient of Variation, CV 0.57) (N=298); 1B – Late daughters (last daughter) of the  
663 founding early daughters of 1A (Median±stdev lifespan  $4.4 \pm 7.0$  hours, Coefficient of Variation, CV  
664 1.03) (N=298); 1C – Second generation late daughters (last daughter of the late daughters of 1B;  
665 (Median±stdev lifespan  $3.4 \pm 7.1$  hours, Coefficient of Variation, CV 1.14) (N=298). (Fig. S1 & S3).  
666 Hence, early daughters are the mothers of late daughters and grandmothers of second generation late  
667 daughters.

668

### 669 **Heritability or cross generation correlation in lifespan**

670 In order to estimate correlation of lifespan between mother cells (early daughters) and their last (late)  
671 daughter cells, we used linear models on square root transformed data for age at death (lifespan) for the  
672 mothers' lifespan as response variable and their last daughters' lifespan as explanatory variable, or  
673 intercept only models (null model) as comparative models.

674

675 Model selection (Table S6) does not allow distinguishing between the two alternative models and we ca  
 676 nnot completely rule out that the longer-lived mothers produce slightly shorter-lived late daughters (Fig  
 677 . 2G). In any case, the effect size is weak and such a negative correlation would suggest that longer-live  
 678 d mothers accumulate more damage that is then partly transmitted to their late daughter. Similar results  
 679 hold for late daughters to second generation late daughters (Fig. S8). We cannot completely rule out a w  
 680 eak tendency that long-lived (late daughter) mothers produce last daughters (second generation late dau  
 681 ghters) that live slightly shorter (Table S6). In any case, our simulations with a low fixed transmission r  
 682 ate of 7% of damage transmitted between mother and daughters would lead to much higher correlation i  
 683 n lifespan as observed (Fig. 3E main text).

684

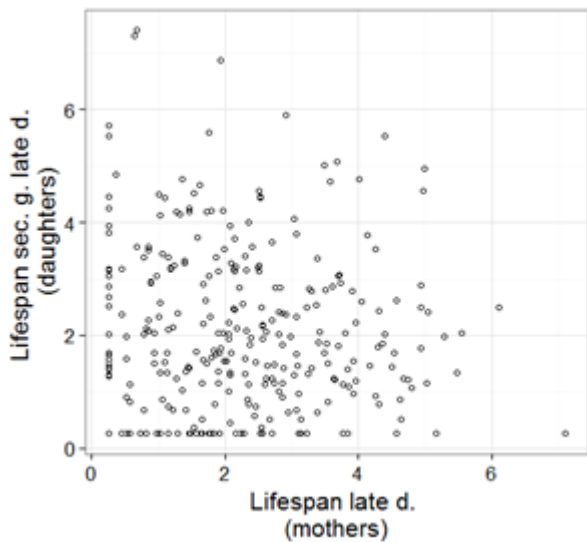

685

686 Fig. S8: Correlation between lifespan (Square root-transformed) of the 298 late daughters [mothers]  
 687 versus the lifespan of their last daughter cell, the second generation late daughters (Table S6).

688

689 Table S6: Model selection for correlation between lifespan (Square root transformed, Gaussian error)

| Model                                                                                    | Slope | Std. Error | T value | p-value | AIC | $\Delta$ AIC |
|------------------------------------------------------------------------------------------|-------|------------|---------|---------|-----|--------------|
| <b>Early daughters [516 mothers] and daughter cell (last daughter of early daughter)</b> |       |            |         |         |     |              |



|                                                                                                                          |       |      |       |      |        |     |
|--------------------------------------------------------------------------------------------------------------------------|-------|------|-------|------|--------|-----|
| sqrt(Lifespan Daughters) ~ sqrt(Lifespan mothers)                                                                        | -0.10 | 0.05 | -1.8  | 0.07 | 1774.1 |     |
| sqrt(Lifespan Daughters) ~ intercept only                                                                                |       |      |       |      | 1775.5 | 1.3 |
| <b>Late daughters [mothers 298] and second generation late daughters (last daughter cell produced by late daughters)</b> |       |      |       |      |        |     |
| sqrt(Lifespan Daughters) ~ sqrt(Lifespan mothers)                                                                        | -0.09 | 0.06 | -1.55 | 0.12 | 1061.1 |     |
| sqrt(Lifespan Daughters) ~ intercept only                                                                                |       |      |       |      | 1061.5 | 0.4 |

690

691 **Lifespan and lifetime reproductive success: reproductive and chronological aging**

692 Previous aging studies on *E. coli* (Stewart et al. 2005, Wang et al. 2010) and other bacteria (Ackermann  
 693 et al. 2003) or many yeast studies (Denoth Lippuner et al. 2014) have focused on replicative aging and  
 694 patterns have been described for time measured in number of divisions. Such age measures can be  
 695 difficult to compare directly to chronological age if the time between divisions varies. Nonetheless, we  
 696 detected a strong correlation between lifespan and the lifetime reproductive success (number of divisions  
 697 an individual undergoes throughout its life), but there remains some variation, particularly for longer  
 698 lived individuals (Fig. S4).

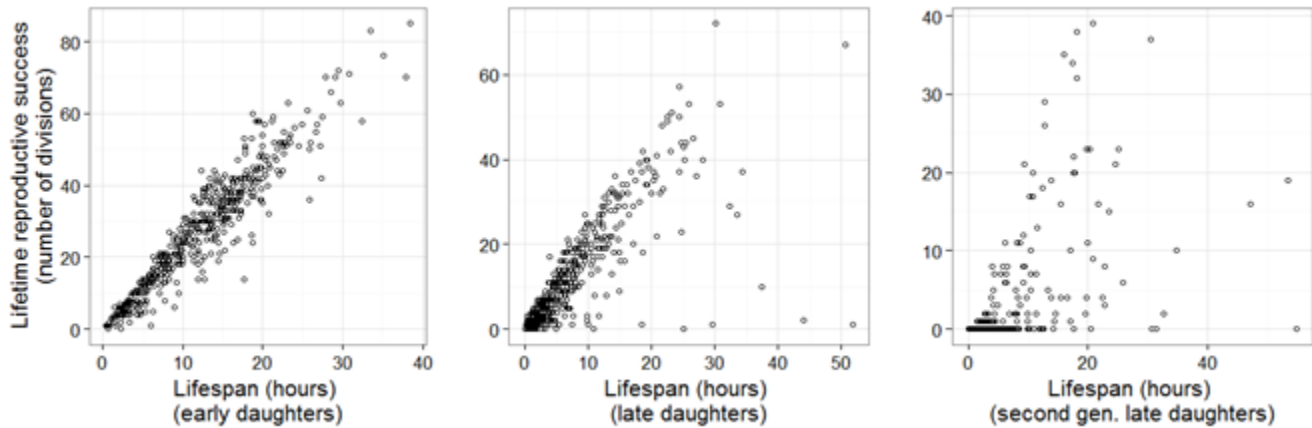

699

700 Fig. S4: Correlation between lifespan and the lifetime reproductive success (cumulative number of  
 701 divisions an individual undergoes throughout its life) for left panel) the 516 early daughters, mid panel)  
 702 the 516 late daughters, and right panel) the 298 second generation late daughters.

703

704 **Division rate**

705 We fitted linear models on hourly average division rates (at the cellular level) as response variable and  
 706 age as explanatory variable. A model with a linear and quadratic term was best supported for the early  
 707 (Fig. 2A), late (Fig. 2B) and second generation late (Fig. S3A) daughters (Table S2).

708

709 Table S2: Model selection division rate

| Model                                   | Slope±Std. Error    | Quadratic term±StdE   | AIC           | ΔAIC |
|-----------------------------------------|---------------------|-----------------------|---------------|------|
| <b>Early daughters</b>                  |                     |                       |               |      |
| Divison rate ~intercept only            |                     |                       | 19663         | 24   |
| Divison rate ~age                       | -0.011±0.002        |                       | 19642         | 21   |
| <b>Divison rate ~age+age^2</b>          | <b>0.005±0.0078</b> | <b>-0.0007±0.0003</b> | <b>19638</b>  |      |
| <b>Late daughters</b>                   |                     |                       |               |      |
| Divison rate ~intercept only            |                     |                       | 12432         | 24   |
| Divison rate ~age                       | -0.009±0.004        |                       | 12428         | 20   |
| <b>Divison rate ~age+age^2</b>          | <b>0.039±0.011</b>  | <b>-0.002±0.0005</b>  | <b>12408</b>  |      |
| <b>Second generation late daughters</b> |                     |                       |               |      |
| Divison rate ~intercept only            |                     |                       | 5494          | 63.3 |
| Divison rate ~age                       | 0.009±0.004         |                       | 5490.3        | 59.6 |
| <b>Divison rate ~age+age^2</b>          | <b>0.090±0.011</b>  | <b>-0.004±0.0004</b>  | <b>5430.7</b> |      |

710

711 **Mortality rate**

712 We fitted Gamma-Gompertz-Makeham related models to the survival data. GGM models were tested for  
 713 assumptions among parameters, for instance, whether shape and scale parameters are independent or  
 714 defined by a rate parameter. For late (Fig. 2D) and second generation late daughters (Fig. S3B), we  
 715 optimized the scaling of the mother to daughter state relationship (transmission factor) based on the age

716 at death state distribution of early daughters (or late daughters for second generation late daughters) (Fig.  
717 S10). We assumed that accumulation of damage, which is the stage transition probabilities did not differ  
718 among early, late and second generation late daughters. We also assumed that the effect of the stage was  
719 not different for early, late or second-generation late daughters. These assumptions allowed us to use the  
720 translated GGM estimates of the early daughters also for late and second generation late daughters.

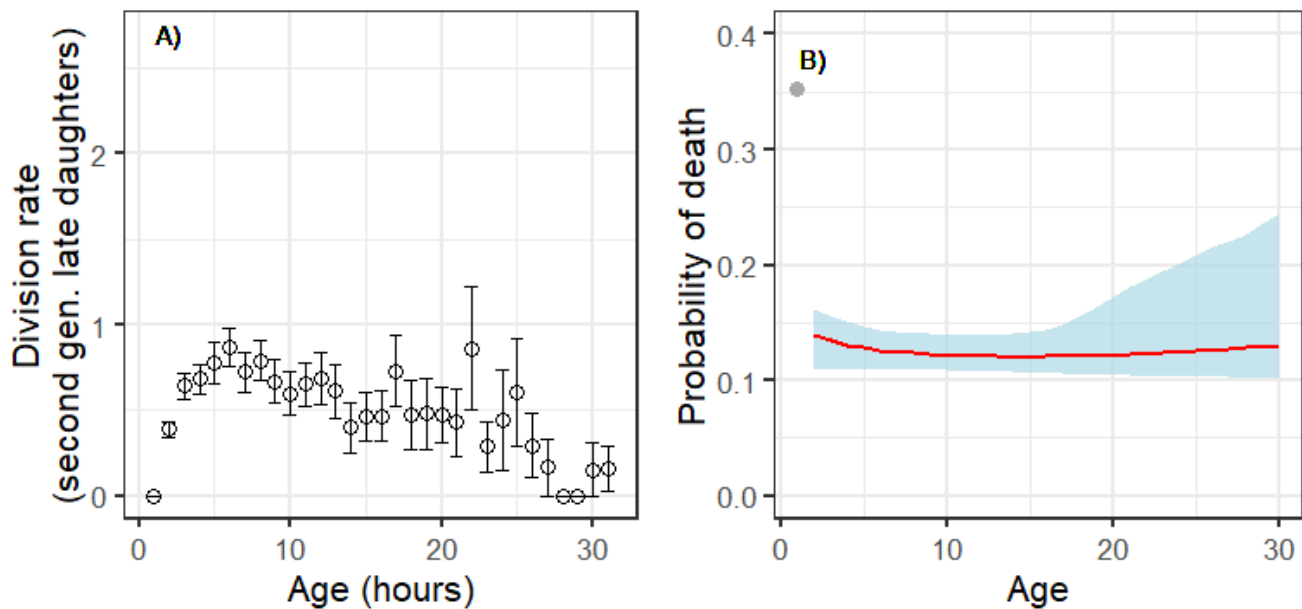

721  
722 Fig. S3: Age-specific division rate (number of divisions per hour) (A) and age-specific hourly mortality  
723 rate (B) of the 298 second generation late daughters. For (A) means  $\pm$  standard errors are plotted, for (B)  
724 fitted regression  $\pm$  95% Confidence Intervals are plotted. Associated model selection results are presented  
725 in Table S2.

### 726 727 **Difference in mortality rates at old ages for early and late daughters**

728 The late age mortality plateau detected in early daughters (Fig. 2C) and the flat mortality hazard pattern  
729 of the late daughters might indicate similar mortality rates at older ages (>19 hours). To test for this we  
730 compared models that distinguished between early and late daughters but only included cells that

731 survived to an age of at least 20 hours. Late daughter cells have lower mortality rates ( $q_x=0.1248\pm 0.0191$   
732  $\text{mean}\pm\text{Std.Err.}$ ) than early daughters at old ages ( $q_x=0.2005\pm 0.0168$   $\text{mean}\pm\text{Std.Err.}$ ) (Table S3) . This  
733 result comprises 73 early daughters and 41 late daughters that lived longer than 19 hours.

734 Table S3: Model selection for age-specific mortality rates ( $q_x$ ) of old (>19h) early daughters and old  
735 (>19h) late daughters, based on binomial models.

| Model                       | Estimate $\pm$ Std. Error          | Quadratic term | AIC         | $\Delta$ AIC |
|-----------------------------|------------------------------------|----------------|-------------|--------------|
| Mortality ~intercept only   |                                    |                | 95.79       | 6.09         |
| <b>Mortality ~cell type</b> | <b>-0.591<math>\pm</math>0.211</b> |                | <b>89.7</b> |              |

736

### 737 **Cell elongation rates**

738 We illustrate findings for cell elongation rates for early, late and second generation late daughters (Fig.  
739 S2). When comparing linear models, the best fitted model for all three cell types was a model with a  
740 linear and quadratic term, though the curvature was minimal for early daughters (Table S1). Early and  
741 late daughters showing a decline in cell elongation rate with age, while second generation late daughters  
742 patterns are less clear.

743

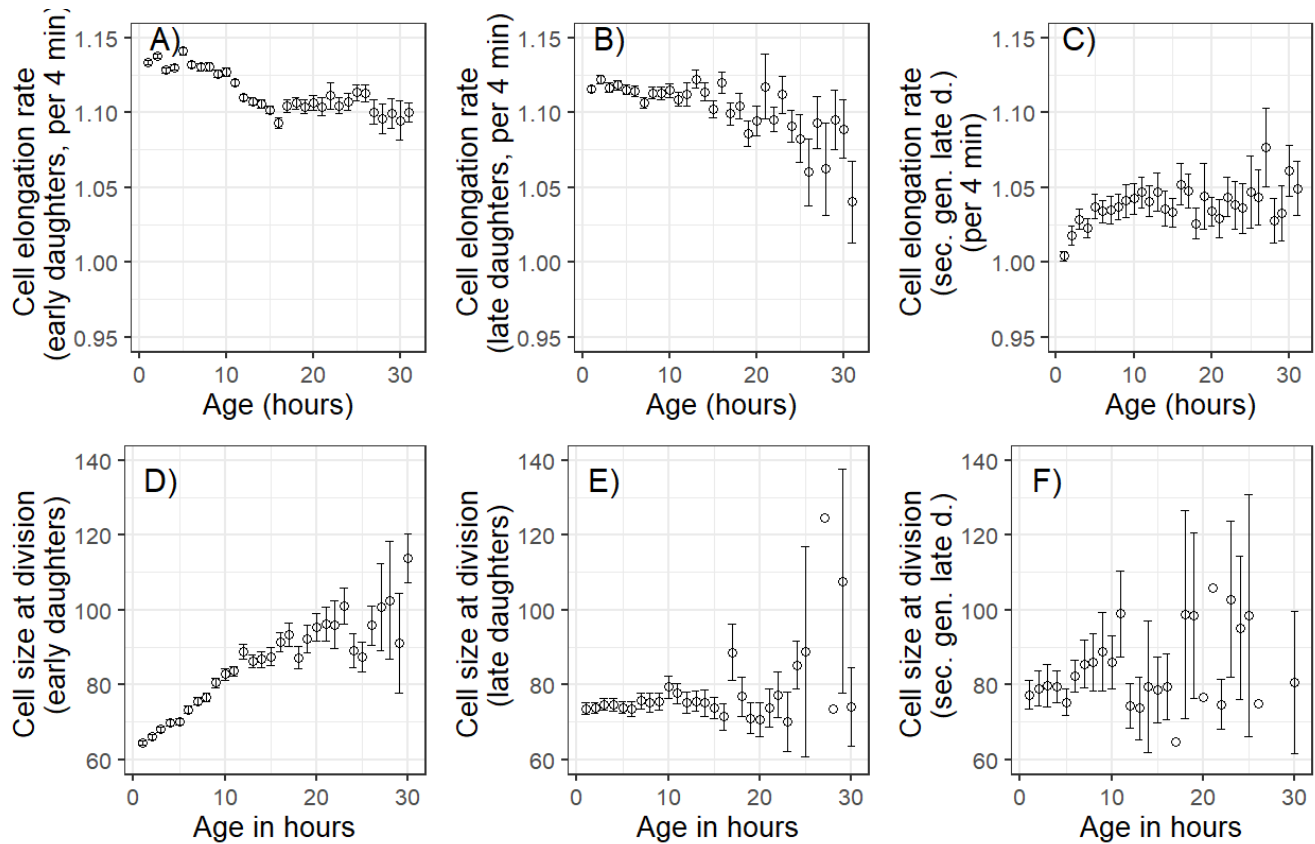

744

745 Fig. S2 Cell elongation and cell size:

746 A-C) Age-specific cell elongation rate (fractional elongation) and D-F) cell size at division (in pixels,  
 747 1pixel=0.064  $\mu\text{m}$ ) of the A&D) 516 early daughter cells, B&E) 516 late daughter cells, and C&F) 298  
 748 second generation late daughter cells. Hourly means  $\pm$  standard errors are plotted. Associated model  
 749 comparisons are presented in Table S1).

750

751 Table S1: Model selection for age-specific cell elongation rates and cell size at division.

| Model                                       | Cell elongation rates               |                                        | AIC           | $\Delta$ AIC |
|---------------------------------------------|-------------------------------------|----------------------------------------|---------------|--------------|
|                                             | Slope $\pm$ Std. Error              | Quadratic term                         |               |              |
| <b>Early daughters</b>                      |                                     |                                        |               |              |
| Elongation rate ~interc. only               |                                     |                                        | -21415        | 407          |
| Elongation rate ~age                        | -0.002 $\pm$ 0.0001                 |                                        | -21820        | 2            |
| <b>Elongation rate ~age+age<sup>2</sup></b> | <b>-0.002<math>\pm</math>0.0002</b> | <b>-0.00002<math>\pm</math>0.00001</b> | <b>-21822</b> |              |
| <b>Late daughters</b>                       |                                     |                                        |               |              |

|                                                  |                         |                          |                |             |
|--------------------------------------------------|-------------------------|--------------------------|----------------|-------------|
| Elongation rate ~interc.<br>only                 |                         |                          | -10264         | 45          |
| Elongation rate ~age                             | -0.00102±0.00016        |                          | -10304         | 5           |
| <b>Elongation rate<br/>~age+age<sup>2</sup></b>  | <b>0.00013±0.00047</b>  | <b>-0.000052±0.00002</b> | <b>-10309</b>  |             |
| <b>Second generation late daughters</b>          |                         |                          |                |             |
| Elongation rate ~interc.<br>only                 |                         |                          | -4042.4        | 32.1        |
| Elongation rate ~age                             | 0.0014735±0.00029       |                          | -4065.1        | 10.4        |
| <b>Elongation rate<br/>~age+age<sup>2</sup></b>  | <b>0.00429±0.00088</b>  | <b>-0.00012±0.000035</b> | <b>-4074.5</b> |             |
| <b>Cell size at division</b>                     |                         |                          |                |             |
| <b>Model</b>                                     | <b>Slope±Std. Error</b> | <b>Quadratic term</b>    | <b>AIC</b>     | <b>ΔAIC</b> |
| <b>Early daughters</b>                           |                         |                          |                |             |
| Size at division ~interc.<br>only                |                         |                          | 53741          | 1378        |
| Size at division ~age                            | 1.72±0.04               |                          | 52431          | 68          |
| <b>Size at division<br/>~age+age<sup>2</sup></b> | <b>2.797±0.135</b>      | <b>-0.049±0.006</b>      | <b>52362</b>   |             |
| <b>Late daughters</b>                            |                         |                          |                |             |
| Size at division ~interc.<br>only                |                         |                          | 28592          | 101         |
| Size at division ~age                            | 0.75±0.09               |                          | 28525          | 34          |
| <b>Size at division<br/>~age+age<sup>2</sup></b> | <b>2.204±0.259</b>      | <b>-0.069±0.012</b>      | <b>28491</b>   |             |
| <b>Second generation late daughters</b>          |                         |                          |                |             |
| Size at division ~interc.<br>only                |                         |                          | 8381.7         | 276.2       |
| Size at division ~age                            | 3.036±0.223             |                          | 8215.9         | 110.4       |
| <b>Size at division<br/>~age+age<sup>2</sup></b> | <b>8.919±0.576</b>      | <b>-0.293±0.027</b>      | <b>8105.5</b>  |             |

752

### 753 **Size at division**

754 We illustrate cell size at division for early, late, and second generation late daughters (Fig. S2). When  
 755 comparing linear models, the best fitted model for all three cell types was a model with a linear and  
 756 quadratic term, though the curvature was minimal for early and late daughters (Table S1). Early daughters  
 757 showed clear senescence in cell elongation rate, late daughters showed weaker senescence in cell  
 758 elongation rate, and patterns for second-generation late daughters are less clear.

759

760 **Reverse time analyses: Hours before death**

761 Chronological aging follows individuals from birth to death and time counted starts at birth. Various  
762 hypotheses about the evolution of life histories, aging and senescence, in particular, terminal investment  
763 strategies (Williams 1966, Clutton-Brock 1984, Charlesworth 1994), assume that individuals can sense  
764 that they are approaching death and that an optimal strategy for an individual might be to invest remaining  
765 resources into reproduction rather than maintenance when approaching immediate death. Such terminal  
766 investment has also been labeled as terminal illness, last year effect, or similar terms, and have been  
767 studied in a broad range of taxa, also using reverse time analyses (Coulson and Fairweather 2001). As  
768 Fig. 2 & Fig. 3 in the main text illustrates, age at death is highly variable, for that chronological  
769 senescence patterns and terminal investment strategies might provide very different insights. We  
770 investigated whether patterns in reproduction (division rate), cell elongation rate, or size at division differ  
771 significantly when time is counted backward (remaining lifespan), starting with death. We would expect  
772 that the last hour before death would show significant changes compared to the more spread out  
773 chronological senescence patterns (Fig. 2, Fig. S3 & S4). In general, there seems to be little evidence that  
774 terminal investment is happening to a larger degree, at least such strategies if existent, do not show larger  
775 effects compared to chronological aging and classical senescence (Fig. S5 & S6, Table S4 & S5).

776

777 **Division rate for hours before death**

778 When individual cells approach death, their division rates decrease (Fig. S5), and these senescence  
779 patterns are similar compared to the (chronological) senescence patterns (Fig. 2A, B) (Table S4 & Table  
780 S2).

781

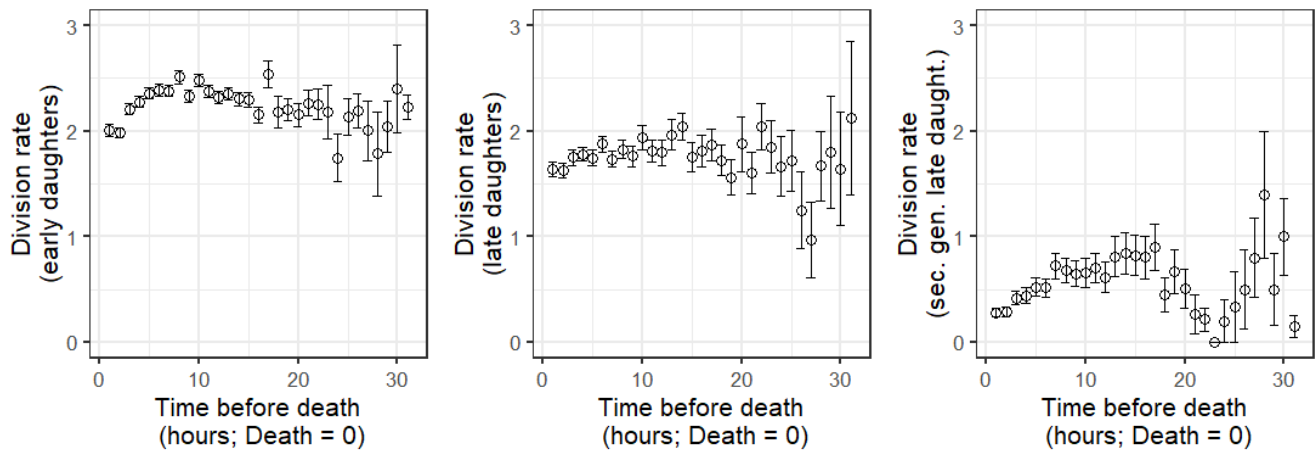

782

783 Fig. S5: Hourly division rate for hours before death [remaining life time] (death = time 0) for left panel  
 784 the 516 early daughters cells, mid panel the 516 late daughters, and right panel the 298 second generation  
 785 daughters. Means  $\pm$  standard errors are plotted. Associated model selection is shown in Table S4.

786

787

Table S4: Model selection for division rate in reverse time (starting with age at death=0).

| Model                                                 | Slope $\pm$ Std. Error             | Quadratic term                      | AIC           | $\Delta$ AIC |
|-------------------------------------------------------|------------------------------------|-------------------------------------|---------------|--------------|
| <b>Early daughters</b>                                |                                    |                                     |               |              |
| Division rate ~interc. only                           |                                    |                                     | 19567         | 69           |
| Division rate ~reverse time                           | 0.006 $\pm$ 0.002                  |                                     | 19561         | 64           |
| <b>Division rate ~ reverse time + reverse time ^2</b> | <b>0.062<math>\pm</math>0.0070</b> | <b>-0.002<math>\pm</math>0.0003</b> | <b>19497</b>  |              |
| <b>Late daughters</b>                                 |                                    |                                     |               |              |
| Division rate ~interc. only                           |                                    |                                     | 12171         | 8            |
| Division rate ~reverse time                           | 0.006 $\pm$ 0.003                  |                                     | 12170         | 7            |
| <b>Division rate ~ reverse time + reverse time ^2</b> | <b>0.036<math>\pm</math>0.017</b>  | <b>-0.001<math>\pm</math>0.0004</b> | <b>12163</b>  |              |
| <b>Second generation daughters</b>                    |                                    |                                     |               |              |
| Division rate ~interc. only                           |                                    |                                     | 5474.5        | 47.8         |
| Division rate ~reverse time                           | 0.015 $\pm$ 0.003                  |                                     | 5456          | 29.3         |
| <b>Division rate ~ reverse time + reverse time ^2</b> | <b>0.069<math>\pm</math>0.017</b>  | <b>-0.002<math>\pm</math>0.0004</b> | <b>5426.7</b> |              |

788

789 **Cell elongation rate for hours before death**



790 The cell elongation rate does not drastically fall off when approaching death (no initial step increase in  
791 cell elongation rate close to the time of death) (Fig. S6, Table S5). The senescence pattern is, at least for  
792 early and late daughters, less pronounced compared to that observed for chronological senescence (Fig.  
793 S2). Second generation daughters seem to reduce cell growth rates before death more substantially, but  
794 this reduction already starts a few hours before death and is not in line with terminal investment theories.

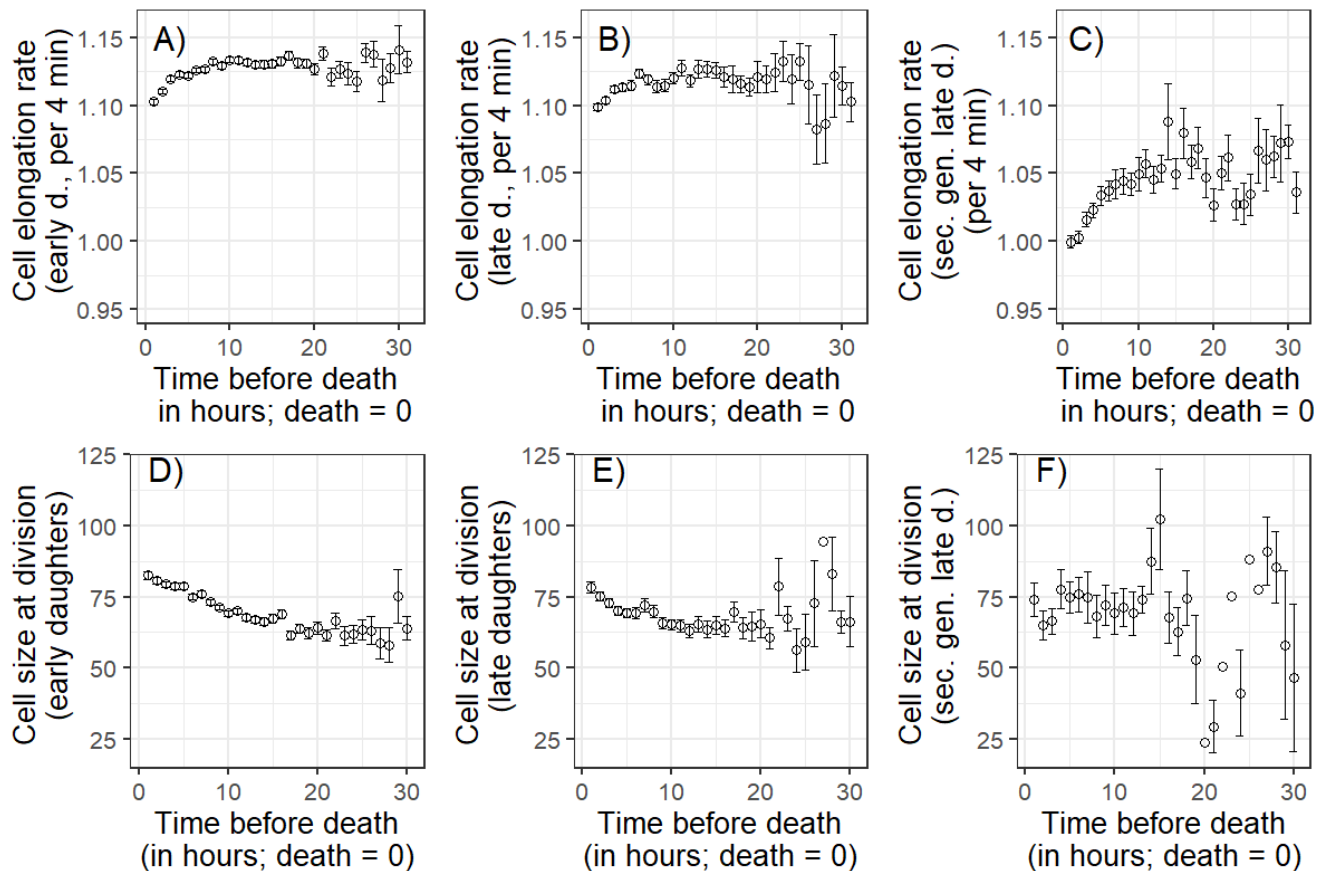

795  
796 Fig. S6: (Fractional) Cell elongation rate and cell size at division (in pixels, 1pixel=0.064  $\mu\text{m}$ ) for hours  
797 before death (death = time 0) for A & D) the 516 early daughters, B & E) the 516 late daughters, and C  
798 & F) the 298 second generation late daughters. Means  $\pm$  standard errors are plotted. Associated model  
799 selection is shown in Table S5.

800

801 Table S5: Model selection for cell elongation and cell size at division rate in reverse time (starting with  
802 age at death=0).

| Model                                                    | Cell elongation (reverse time)              |                        | AIC            | ΔAIC  |
|----------------------------------------------------------|---------------------------------------------|------------------------|----------------|-------|
|                                                          | Slope±Std. Error                            | Quadratic term         |                |       |
|                                                          | <b>Early daughters</b>                      |                        |                |       |
| Elongation rate ~interc. only                            |                                             |                        | -22138         | 250   |
| Elongation rate ~reverse time                            | 0.001±0.00009                               |                        | -22288         | 100   |
| <b>Elongation rate ~ reverse time + reverse time ^2</b>  | <b>0.004±0.0003</b>                         | <b>-0.0001±0.00001</b> | <b>-22388</b>  |       |
|                                                          | <b>Late daughters</b>                       |                        |                |       |
| Elongation rate ~interc. only                            |                                             |                        | -10529         | 65    |
| Elongation rate ~reverse time                            | 0.001±0.0001                                |                        | -10561         | 33    |
| <b>Elongation rate ~ reverse time + reverse time ^2</b>  | <b>0.003±0.0004</b>                         | <b>-0.0001±0.00002</b> | <b>-10594</b>  |       |
|                                                          | <b>Second generation late daughters</b>     |                        |                |       |
| Elongation rate ~interc. only                            |                                             |                        | -4082.8        | 122.1 |
| Elongation rate ~reverse time                            | 0.003±0.0003                                |                        | -4167.5        | 37.4  |
| <b>Elongation rate ~ reverse time + reverse time ^2</b>  | <b>0.008±0.0009</b>                         | <b>-0.0002±0.00003</b> | <b>-4204.9</b> |       |
|                                                          | <b>Cell size at division (reverse time)</b> |                        |                |       |
|                                                          | <b>Early daughters</b>                      |                        |                |       |
| Size at division ~interc. only                           |                                             |                        | 53679          | 386   |
| Size at division ~reverse time                           | -0.952±0.0486                               |                        | 53299          | 6     |
| <b>Size at division ~ reverse time + reverse time ^2</b> | <b>-1.337±0.145</b>                         | <b>0.018±0.006</b>     | <b>53293</b>   |       |
|                                                          | <b>Late daughters</b>                       |                        |                |       |
| Size at division ~interc. only                           |                                             |                        | 28629          | 26    |
| Size at division ~reverse time                           | -0.438±0.088                                |                        | 28606          | 3     |
| <b>Size at division ~ reverse time + reverse time ^2</b> | <b>-0.990±0.258</b>                         | <b>0.026±0.011</b>     | <b>28603</b>   |       |
|                                                          | <b>Second generation late daughters</b>     |                        |                |       |
| Size at division ~interc. only                           |                                             |                        | 8182.3         | 54.9  |

|                                                          |                    |                     |               |      |
|----------------------------------------------------------|--------------------|---------------------|---------------|------|
| Size at division ~reverse time                           | 1.254±0.236        |                     | 8156.6        | 29.2 |
| <b>Size at division ~ reverse time + reverse time ^2</b> | <b>4.531±0.627</b> | <b>-0.158±0.028</b> | <b>8127.4</b> |      |

803

#### 804 **Cell size at division for hours before death**

805 Cell size at division increased with chronological age, but mainly for early daughters (Fig. S2). One  
806 mechanism that might lead to such an increase in cell size at division is the formation of filamentous  
807 cells: cells that do continue to elongate but stop dividing. Such filamentation is usually seen as a stress  
808 response and increases mortality of the cell (Mattick et al. 2003, Wang et al. 2010). Previous studies  
809 (conducted under different media and temperature than ours) have reported higher filamentation rates  
810 with increasing age (Wang et al. 2010). Under our growth conditions, cells that entered a filamentation  
811 stage rarely recovered from that stage and did not return to a regular dividing smaller cell, though they  
812 not always stalled dividing. To test if such filamentous cells drive the chronological senescence pattern  
813 in size at division, we investigated the cell size for the hours before death. For early and late daughters,  
814 we detected an increase in cell size at division before death, but this increase is already initiated hours  
815 before the actual death and not a final increase in size due to filamentation (Fig. S6, Table S5).

816

#### 817 **Random deterioration model**

818 Our random deterioration model builds on a LeBras type cascading failure model (Le Bras 1976). In such  
819 discrete state models, individuals increase from a current state  $i$  to a state  $i+1$  at a rate proportional to  $i$ ,  
820 and mortality increases proportionally to state  $i$ . We can think of such states as accumulating damage, or  
821 model the reverse process, where an individual starts with some vitality and this vitality then decreases  
822 with increasing state  $i$  (random deterioration) (Weitz and Fraser 2001). In this study, we assume

823 accumulating damage that stands symbolically for an unknown aging factor. These random deterioration  
824 models are mathematically closely linked to demographic frailty models that do not assume a stochastic  
825 stage progression among individuals, but rather heterogeneity of individual is defined by fixed frailty at  
826 birth (Yashin et al. 1994). Such frailty, an age independent mortality that follows a gamma distribution  
827 (Missov and Vaupel 2015), can be added to the classical models in demography, a Gompertz- model,  
828 which describes an age-dependent exponential increase in mortality. These models can also be extended  
829 by a Makeham term, an age-independent baseline mortality, which further improves model fit, at least  
830 for humans and various other complex species.

831

832 We first estimated parameters of such a Gamma-Gompertz-Makeham (GGM) model,  $Zae^{bx+c}$  fitted to  
833 the survival data of the early daughters.  $Z$  is the random frailty variable that follows a gamma distribution  
834 across individuals. The distribution has a mean 1 and variance of  $\sigma^2$ . This definition of a gamma  
835 distribution with a mean of 1 implies that we have to set the scale parameter equal to the shape parameter  
836 of the gamma distribution. The rate of aging,  $b$ , is the same for all individuals,  $x$  determines the age in  
837 hours,  $a$  describes the baseline mortality of the Gompertz part of the model, and  $c$  describes the Makeham  
838 term, the age independent mortality.

839

840 We then transformed these estimates of the GGM model to a random deterioration model according to  
841 Yashin et al. (Yashin et al. 1994), making use of mathematical similarities between the GGM and random  
842 deterioration models.

843 Let  $t(i) = \lambda_0 + i \lambda$ ,  $m(i) = \mu_0 + i\mu$  (for  $i$  greater than or equal to 0) denote the state transition rate and the  
844 death rate, respectively.

845  $\mu_0 = a + c$ , the death rate at birth i.e. state  $i=0$ ,

846  $\lambda_0 = \frac{b}{\sigma^2} - a$ , the transition rate from state  $i=0$  to state  $i=1$ ,

847  $\lambda = b - \sigma^2 a$ , the change in the state transition rate between state  $i$  and  $i+1$ , for  $i>0$

848  $\mu = \sigma^2 a$ , the change in the death rate at state  $i$ , for  $i>0$

849

850 Resulting estimates for early daughters were  $\mu_0=0.056$ ,  $\lambda_0 = 0.178$ ,  $\lambda = 0.598$ , and  $\mu = 0.00023$ .

851 Using these estimates for early daughters, we estimated the probability of observing an individual at state

852  $i$  at age  $x$ ,  $P(x, i)$ ,

$$853 \quad P_i(x) = \begin{cases} P_0(0)e^{-(\lambda_0+\mu_0)x}, & i = 0 \\ \frac{P_0(x)}{i!} \left[ \frac{\lambda - \lambda e^{-(\lambda+\mu)x}}{\lambda + \mu} \right] \prod_{k=1}^i \left( \frac{\lambda_0}{\lambda} + (k-1) \right), & i > 0 \end{cases}$$

854 We then built a matrix of  $P(x, i)$  for which we limited the age,  $x$ , between 0 and 31 and the states were

855 limited between 0 and 5000. The column sum of this matrix equals the survival probability at any given

856 age  $x$  to age  $x+1$ .

### 857 Microsimulations of the random deterioration model

858 In order to simulate the (damage) state at death distribution we used a microsimulation. As a step-by-

859 step calculation would take too long, we modelled the state at death distribution by drawing of a Poisson

860 distribution with a rate of  $\frac{1}{\mu_0 + \hat{i}\mu}$ , where  $\hat{i} = i + \frac{1}{\mu_0 + i\mu}$ . In doing so, we estimated the expected state at

861 death, rather than tracking individuals transitioning through damage states and their associated mortality

862 risk as a step-by-step calculation would do. A step-by-step simulation would take a long time because

863 individuals can easily end up in very high damage states (very long tailed distributions).

864

### 865 Estimating parameters for the late daughters

866 For the late daughters, we used the same state transition and survival parameters ( $\mu_0=0.056$ ,  $\lambda_0 = 0.178$ ,  
867  $\lambda = 0.598$ , and  $\mu = 0.00023$ ) that we estimated for the early daughters. We did so because early and  
868 late daughter cells should biologically not be fundamentally different – aside of starting with different  
869 damage levels at birth. They should accumulate damage at the same rate and should experience mortality  
870 risk just based on their damage state. We assumed that the late daughters are born at the same stage, or a  
871 scaled version of the same stage, in which the mothers died, therefore let

$$872 \quad \lambda_{0,late} = nint(s(\lambda_{0,early} + i\lambda))$$

$$873 \quad \mu_{0,late} = nint(s(\mu_{0,early} + i\mu))$$

874 Where subscript *late* and *early* denotes late and early daughter estimates and  $s \in (0,1)$  and  $nint(.)$  is  
875 the nearest integer function. So based on the estimated damage state distribution of the mothers at death  
876 (early daughters), we also knew the damage state distribution at birth of the daughters (late daughters)  
877 [see below for optimally scaling this distribution]. Using the state transition probabilities of the early  
878 daughters and the probabilities of death, we estimated the survival of the late daughters. We also  
879 estimated the survival functions of cells that did not change their damage state with age. Each grey line  
880 in main text Fig. 3, describes such a fixed damage class survival function.

881 In order to determine the transmission fraction of accumulated damage between mothers (early  
882 daughters) and daughters (late daughters), we optimized the scaling of the mother state at death  
883 distribution (fraction of mother-daughter transmission) to the daughter age at birth distribution. The  
884 optimization was based on observed survival of the late daughters, by minimizing the squared deviations  
885 from the observed survival function. This optimal scaling factor was estimated at 7%.

886 Similar to the late daughters, we simulated the damage state distribution at birth, the damage state  
887 distribution at death, and calculated the matrix  $P(x, i)$  for the second generation late daughters.

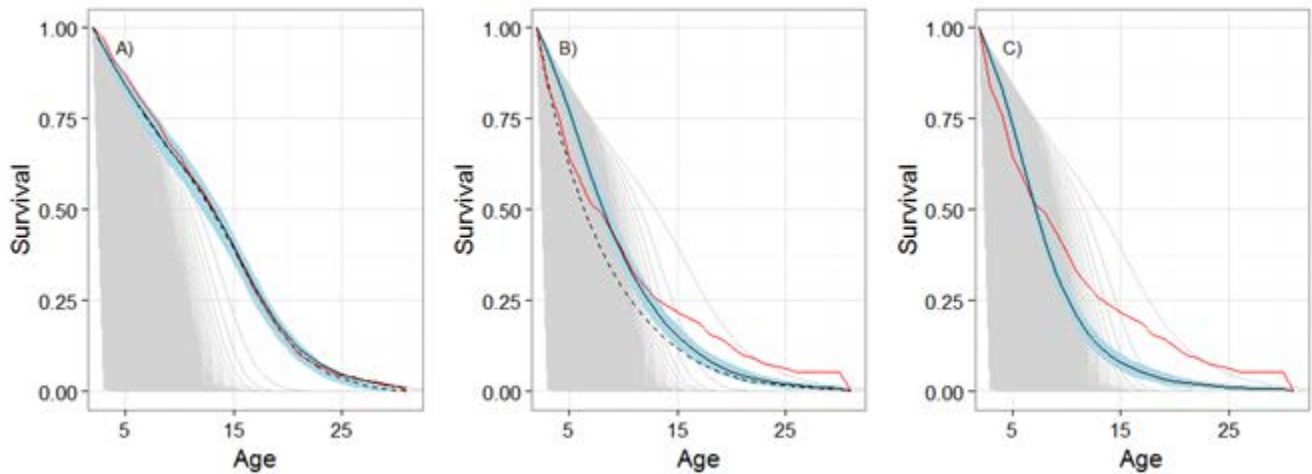

888

889 Fig. S9: Observed population level survival curve (red line), GGM simulated survival curve with  
890 symmetric damage transmission (hatched black line) as well as GGM simulated survival curve with  
891 asymmetric damage transmission of 7% (solid black line  $\pm$  95% CI in blue) for early (A), late (B) and  
892 second generation late daughters (C). Graphs A & B are identical to Fig. 1C & D. Thin grey lines in  
893 depict expected survival curve of cells with different fixed damage state. That is, for instance, the  
894 outermost thin grey line in B depicts the survivorship curve of a hypothetical cohort that starts without  
895 damage and never accumulates any damage. The most left survival curve illustrates the low survival of  
896 cells that were born with maximum damage level of 5000.

897

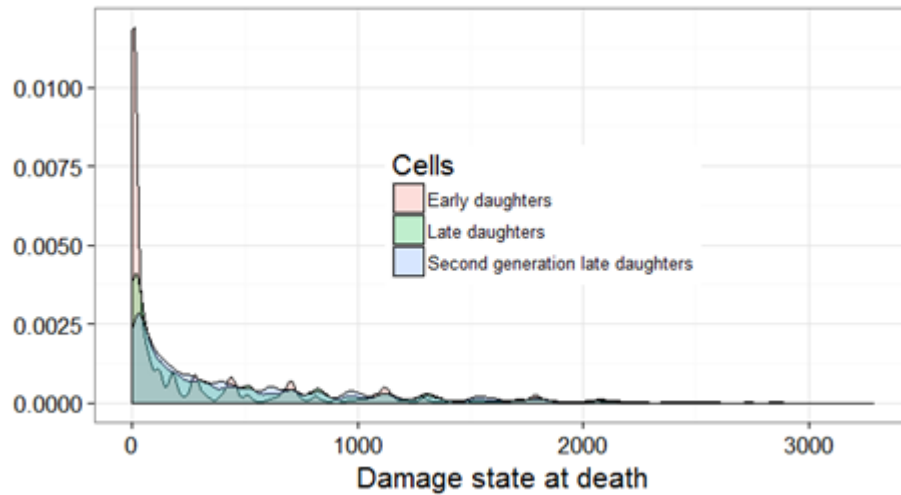

898

899 Fig. S10: Density distribution of damage state at death of early daughters, late daughters, and second  
900 generation late daughters. Most cells die with little accumulated damage. Note, the not so smooth tails  
901 of the distributions are a result of drawing from a Poisson distribution in our simulations.

902

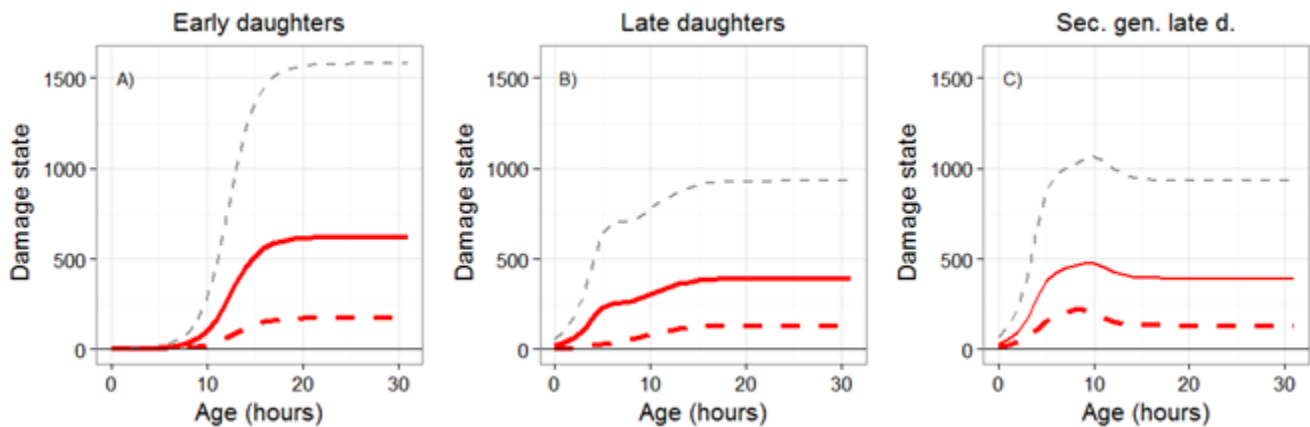

903

904 Fig. S11: GGM model results: mean (red solid line, + SD grey hatched lines) and median (red hatched  
905 line) damage state with increasing age for early daughter cells (A), and late daughter cells (B) and second  
906 generation late daughter cells (C). Panel A & B are identical to Panel Fig. 1A, B.

907



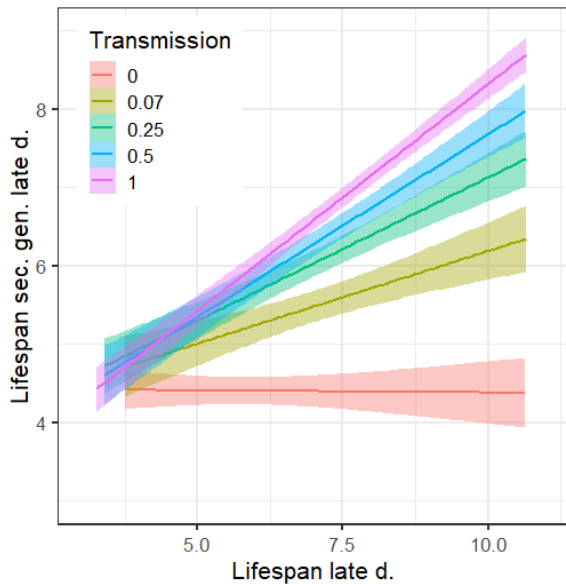

908

909 Fig. S12: Lifespan (square root transformed) of simulated 516 late daughter cells (mothers) versus the  
910 lifespan of their simulated last daughter cell (second generation late daughter cells) with different levels  
911 of mother to daughter damage transmission. Scenarios include the optimized fixed transmission level at  
912 0.07 (forest green), a scenario for perfect rejuvenation, i.e. 0 transmission (red), 0.25 transmission  
913 (green), 0.5 transmission, i.e. symmetric (equal) transmission between mother and daughter (blue), and  
914 transmission of all accumulated damage to the daughter (1) (pink). CI are shown for each correlation in  
915 lifespan between mothers and daughters as shaded areas.

916

## 917 **References**

- 918 Ackermann, M. 2015. A functional perspective on phenotypic heterogeneity in microorganisms. - *Nat.*  
919 *Rev. Microbiol.* 13: 497–508.
- 920 Ackermann, M. et al. 2003. Senescence in a bacterium with asymmetric division. - *Science* 300: 1920.
- 921 Ackermann, M. et al. 2007. On the evolutionary origin of aging. - *Aging Cell* 6: 235–44.

- 922 Aoki, S. K. et al. 2005. Contact-Dependent Inhibition of Growth in *Escherichia coli*. - *Science* (80-. ).  
923 in press.
- 924 Balázsi, G. et al. 2011. Cellular decision making and biological noise: from microbes to mammals. -  
925 *Cell* 144: 910–925.
- 926 Blattner, F. R. 1997. The Complete Genome Sequence of *Escherichia coli* K-12. - *Science* (80-. ). 277:  
927 1453–1462.
- 928 Brillinger, D. R. 1986. A Biometrics Invited Paper with Discussion: The Natural Variability of Vital  
929 Rates and Associated Statistics. - *Biometrics* 42: 693.
- 930 Burnham, K. and Anderson, D. R. 1998. Model selection and multimodel inference : a practical  
931 information-theoretic approach. - Springer.
- 932 Caswell, H. 2001. Matrix population models: construction, analysis, and interpretation. - Sinauer  
933 Associates.
- 934 Charlesworth, B. 1994. Evolution in age-structured populations. - Cambridge University Press.
- 935 Clutton-Brock, T. 1984. Reproductive effort and terminal investment in iteroparous animals. - *Am.*  
936 *Nat.* 123: 212–229.
- 937 Coquel, A.-S. et al. 2013. Localization of protein aggregation in *Escherichia coli* is governed by  
938 diffusion and nucleoid macromolecular crowding effect. - *PLoS Comput. Biol.* 9: e1003038.
- 939 Coulson, J. C. and Fairweather, J. A. 2001. Reduced reproductive performance prior to death in the  
940 Black-legged Kittiwake: senescence or terminal illness? - *J. Avian Biol.* 32: 146–152.
- 941 Davidson, C. J. and Surette, M. G. 2008. Individuality in Bacteria. - *Annu. Rev. Genet.* 42: 253–268.
- 942 Denoth Lippuner, A. et al. 2014. Budding yeast as a model organism to study the effects of age. -  
943 *FEMS Microbiol. Rev.* 38: 300–25.
- 944 Elowitz, M. B. et al. 2002. Stochastic gene expression in a single cell. - *Science* (80-. ). 297: 1183–

- 945 1186.
- 946 Evans, S. N. and Steinsaltz, D. 2007. Damage segregation at fissioning may increase growth rates: a  
947 superprocess model. - *Theor. Popul. Biol.* 71: 473–90.
- 948 Finch, C. and Kirkwood, T. B. 2000. *Chance, Development, and Aging*. - Oxford University Press.
- 949 Gangan, M. S. and Athale, C. A. 2017. Threshold effect of growth rate on population variability of  
950 *Escherichia coli* cell lengths. - *R. Soc. open Sci.* 4: 160417.
- 951 Gasset-Rosa, F. et al. 2014. Direct assessment in bacteria of prionoid propagation and phenotype  
952 selection by Hsp70 chaperone. - *Mol. Microbiol.* 91: 1070–87.
- 953 Hamilton, W. D. 1966. The moulding of senescence by natural selection. - *J. Theor. Biol.* 12: 12–45.
- 954 Jagers, P. 1978. Balanced exponential growth: what does it mean and when is it there? - In:  
955 *Biomathematics and cell kinetics*. Elsevier, pp. 21–29.
- 956 Johnson, L. R. and Mangel, M. 2006. Life histories and the evolution of aging in bacteria and other  
957 single-celled organisms. - *Mech. Ageing Dev.* 127: 786–93.
- 958 Jones, O. R. et al. 2014. Diversity of ageing across the tree of life. - *Nature* 505: 169–73.
- 959 Jouvett, L. et al. 2017. Demographic variability and heterogeneity among individuals within and among  
960 clonal bacteria strains. - *Oikos* in press.
- 961 Kærn, M. et al. 2005. Stochasticity in gene expression: from theories to phenotypes. - *Nat. Rev. Genet.*  
962 6: 451–464.
- 963 Kennedy, B. K. 1994. Daughter cells of *Saccharomyces cerevisiae* from old mothers display a reduced  
964 life span. - *J. Cell Biol.* 127: 1985–1993.
- 965 Kirkwood, T. B. L. 2005. Understanding the odd science of aging. - *Cell* 120: 437–47.
- 966 Kirkwood, T. B. L. et al. 2005. What accounts for the wide variation in life span of genetically identical  
967 organisms reared in a constant environment? - *Mech. Ageing Dev.* 126: 439–443.

- 968 Klein, J. P. and Moeschberger, M. L. 2003. Survival analysis : techniques for censored and truncated  
969 data. - Springer.
- 970 Le Bras, H. 1976. Lois de mortalité et age limite. - Population (Paris). 33: 655–691.
- 971 Lindner, A. B. and Demarez, A. 2009. Protein aggregation as a paradigm of aging. - Biochim. Biophys.  
972 Acta 1790: 980–96.
- 973 Lindner, A. B. et al. 2008. Asymmetric segregation of protein aggregates is associated with cellular  
974 aging and rejuvenation. - Proc. Natl. Acad. Sci. U. S. A. 105: 3076–81.
- 975 López-Otín, C. et al. 2013. The hallmarks of aging. - Cell 153: 1194–217.
- 976 Mattick, K. et al. 2003. Morphological changes to Escherichia coli O157:H7, commensal E. coli and  
977 Salmonella spp in response to marginal growth conditions, with special reference to mildly  
978 stressing temperatures. - Sci. Prog. 86: 103–113.
- 979 Medawar, P. B. 1952. An unsolved problem of biology. - In: Uniqueness of the Individual. H. K.  
980 Lewis, in press.
- 981 Minois, N. et al. 2005. Advances in measuring lifespan in the yeast Saccharomyces cerevisiae. - Proc.  
982 Natl. Acad. Sci. U. S. A. 102: 402–6.
- 983 Missov, T. I. and Vaupel, J. W. 2015. Mortality Implications of Mortality Plateaus. - SIAM Rev. 57:  
984 61–70.
- 985 Norman, T. M. et al. 2013. Memory and modularity in cell-fate decision making. - Nature 503: 481–  
986 486.
- 987 Norman, T. M. et al. 2015. Stochastic Switching of Cell Fate in Microbes. - Annu. Rev. Microbiol. 69:  
988 381–403.
- 989 R Core Team, R. A. language and environment for statistical computing. 2016. R: A language and  
990 environment for statistical computing. (RDC Team, Ed.). - R Found. Stat. Comput. 1: 409.

- 991 Scherbov, S. and Ediev, D. 2011. Significance of life table estimates for small populations: Simulation-  
992 based study of estimation errors. - *Demogr. Res.* 24: 527–550.
- 993 Steiner, U. K. and Tuljapurkar, S. 2012. Neutral theory for life histories and individual variability in  
994 fitness components. - *Proc. Natl. Acad. Sci. U. S. A.* 109: 4684–9.
- 995 Steinsaltz, D. and Evans, S. N. 2004. Markov mortality models: implications of quasistationarity and  
996 varying initial distributions. - *Theor. Popul. Biol.* 65: 319–37.
- 997 Stewart, E. J. et al. 2005. Aging and death in an organism that reproduces by morphologically  
998 symmetric division. - *PLoS Biol.* 3: e45.
- 999 Stroustrup, N. et al. 2016. The temporal scaling of *Caenorhabditis elegans* ageing. - *Nature* 530: 103–  
1000 107.
- 1001 Tyedmers, J. et al. 2010. Cellular strategies for controlling protein aggregation. - *Nat. Rev. Mol. cell*  
1002 *Biol.* 11: 777–788.
- 1003 Vaupel, J. W. and Yashin, A. I. 1985. Heterogeneity's Ruses: Some Surprising Effects of Selection on  
1004 Population Dynamics. - *Am. Stat.* 39: 176.
- 1005 Vaupel, J. W. et al. 1998. Biodemographic Trajectories of Longevity. - *Science* (80-. ). 280: 855–860.
- 1006 Vaupel, J. W. et al. 2004. The case for negative senescence. - *Theor. Popul. Biol.* 65: 339–351.
- 1007 Vera, M. et al. 2016. Single-Cell and Single-Molecule Analysis of Gene Expression Regulation. -  
1008 *Annu. Rev. Genet.* 50: 267–291.
- 1009 Wachter, K. W. 1999. Evolutionary demographic models for mortality plateaus. - *Proc. Natl. Acad. Sci.*  
1010 96: 10544–10547.
- 1011 Wachter, K. W. et al. 2014. Evolutionary shaping of demographic schedules. - *Proc. Natl. Acad. Sci. U.*  
1012 *S. A.* 111 Suppl: 10846–53.
- 1013 Wang, P. et al. 2010. Robust growth of *Escherichia coli*. - *Curr. Biol.* 20: 1099–103.

- 1014 Weitz, J. and Fraser, H. 2001. Explaining mortality rate plateaus. - Proc. Natl. Acad. Sci. U. S. A. 98:  
1015 15383–15386.
- 1016 Williams, G. C. 1957. Pleiotropy, Natural Selection, and the Evolution of Senescence. - Evolution (N.  
1017 Y). 11: 398.
- 1018 Williams, G. C. 1966. Adaptation and natural selection : a critique of some current evolutionary  
1019 thought. - Princeton Univeristy Press.
- 1020 Wolf, M. et al. 2007. Life-history trade-offs favour the evolution of animal personalities. - Nature 447:  
1021 581–584.
- 1022 Yashin, A. I. et al. 1994. A duality in aging: the equivalence of mortality models based on radically  
1023 different concepts. - Mech. Ageing Dev. 74: 1–14.
- 1024
